# Supplementary material for: Complementing regional moment magnitudes to GCMT: aperspective from the rebuilt ISC Bulletin
Source: Copernicus journal article supplement (doi:10.5194/essd-2020-371), 2021-01-13
Supplement: Supplementary file [file essd-2020-371-AC1-supplement.pdf]

Author's Response to the Reviewer's Comments #1  
(PAPER: Complementing regional moment  
magnitudes to GCMT: a perspective from the  
rebuilt ISC Bulletin,  
<https://doi.org/10.5194/essd-2020-371>)

Domenico Di Giacomo      James Harris      Dmitry A. Storchak

March 16, 2021

## Response to Specific comments

We thank the reviewer for his comments. Below we reply in detail to each point showing, in bold, the Reviewer Comment (RC) and, in italic, the Author Response (AR).

**RC: The manuscript is generally well written and easy to follow. The authors are inclusive and consider all possible agencies that are reporting Mw. However, the text would be easier to read by moving text on data sources that provide too few Mw reports (and are not much used in the study) to supplementary material.**

*AR: We have removed the sentences regarding agency MOS. Most of the small reporters are already in the Appendix.*

**RC: While Mw is well covered in the literature, the authors could add a couple of sentences on the basic methodology used by GCMT to obtain the seismic moment, which would be useful for the non-seismologist. It also would be useful to mention limitation of Mw in not being sensitive to energy release.**

*AR: We think that this manuscript is already long enough and the reader would not benefit from us adding a summary of the GCMT methodology. We,*

*however, pointed out in the revised Introduction that Mw alone is not able to "fully characterize the energy release of an earthquake"*

**RC:** The authors avoid providing details on how Mw is measured by the smaller agencies. I think it would be important to at least explain that the methodology may change when going from large to small earthquakes (where moment tensor inversion may no longer be the method that is used). Ideally, the manuscript would benefit to at least give an indication of what is done by the institutions at the regional scale, perhaps in form of a table, as this is needed to even partly understand some of the observations that are made when comparing global and regional Mw.

*AR: We have added Table 1 to summarize what we know about the methodology used by some agency to obtain Mw. Unfortunately for several agency that information is not available to us. The addition of Table 1 in the revised manuscript allows us to address other comments.*

**RC:** It is also possible that Mw is the outcome of a standard automatic procedure – in that case it would be useful if and how the results are revised.

*AR: As in previous reply, this information is not fully available to us.*

**RC:** The authors explain that NEIC reports Mw provided by other agencies and these are labelled. I am concerned if the other way around, regional agencies may also provide Mw that they took from NEIC/GCMT. There may be no issue at all, but if there was the comparison would not be meaningful for those agencies.

*AR: As also explained in reply to another comment below, this may only happen if an agency appropriates under its name the solution from another agency. We are confident that this is not an issue in our case.*

**RC:** The authors appear to be using MS and mb to compare to regional Mw, this may require better justification. It also could be an alternative not to include non-Mw magnitudes in this work.

*AR: This comment is also in the annotated PDF at page 9, line 260. We have added a sentence to the text to clarify why we also use mb and MS ISC*

*in the comparisons with  $M_w$  from GCMT and regional agencies. We believe that such comparisons add significance to the paper.*

## **Response to Technical suggestions**

**RC: More detailed comments on content and language are given in the attached PDF.**

*AR: We are grateful to the reviewer for the language and other stylistic suggestions. We have accepted all of them. We also included (or modified) the text according to some of the reviewer suggestions. In particular we have added sentences in response to the comments at page 1, lines 24 and 25 in the annotated PDF.*

*In response to the suggestion at page 3, line 66, we have added a sentence listing the number of earthquakes in the DH  $M_w$  List with  $M_w \geq 5.0$ , and listed total number of earthquakes in the ISC Bulletin 1964-2017 with ISC  $m_b \geq 5.0$ . We used ISC  $m_b$  rather than any magnitude type available in the ISC Bulletin since we believe that this way we give a more reliable measure of the fraction of the earthquakes without  $M_w$ .*

*At page 4 line 98 of the annotated PDF, the reviewer points out that we give too much detail to NEIC compared to GCMT. This is necessary for two reasons: 1) details of NEIC  $M_w$  computations are less known compared to GCMT methodology; 2) there are four different types of  $M_w$  from NEIC. In addition, we think that this manuscript is already long enough and the reader would not benefit from us adding a summary of the GCMT methodology. However, we moved part of a sentence from the Conclusions regarding GCMT in this section, in line with another reviewer comment.*

*At page 4 line 120 of the annotated PDF, the reviewer suggest to move the sentence to another Section. We believe that the sentence better serves the reader in this section.*

*At page 5 line 154 of the annotated PDF, the reviewer suggest to go more into detail about the procedures adopted by the regional agencies. For this purpose we added in Table 1 a column providing the information whether waveform inversion or spectral analyses are used. With a few exceptions, we cannot be sure when solutions are fully automatic or revised/approved by a seismologist. For several agencies, to the best of our knowledge, the procedures to obtain  $M_w$  are not documented.*

*At page 7 line 219 of the annotated PDF, the reviewer points out that*

*regional agencies may report third parties solutions. In our analyses we reduce this risk by requiring that the Mw author is the same of the agency, therefore the issue may only occur if an agency reports under its author name third parties solutions. In our experience this is an unlikely eventuality.*

*Regarding the comment in the Conclusions at page 11 line 333 of the annotated PDF, we have added the following sentence: “It would also be desirable that agencies document the procedures used over time and whether automatic or revised solutions are obtained.”*

*Regarding the last comment in the Conclusions (page 12, line 353 of the annotated PDF), we cannot dictate to reporting agencies a change in their routines operation to include Mw computations (but we do encourage them). We assume that the reasons for which several regional agencies do not compute Mw vary a lot, but we are not in a position to discuss that in the paper.*

*Finally, we feel that a detailed explanation of the content of the DH Mw list is required in the Section 7.*



# Complementing regional moment magnitudes to GCMT: a perspective from the rebuilt ISC Bulletin

Domenico Di Giacomo<sup>1,\*</sup>, James Harris<sup>1</sup>, and Dmitry A. Storchak<sup>1</sup>

<sup>1</sup>International Seismological Centre (ISC), Pipers Lane, Thatcham, Berkshire, RG19 4NS, United Kingdom

**Correspondence:** Domenico Di Giacomo (domenico@isc.ac.uk)

**Abstract.** Seismologists and geoscientists ~~in general~~ often need earthquake catalogues for various types of research. This input usually contains basic earthquake parameters such as location (longitude, latitude, depth and origin time) as well as magnitude information. For the latter, the moment magnitude  $M_w$  has ~~became~~ become the most sought after magnitude scale in the seismological community to characterize the size of an earthquake. In this contribution we provide an informative account of the  $M_w$  content for the newly rebuilt Bulletin of the International Seismological Centre (ISC, [www.isc.ac.uk](http://www.isc.ac.uk)), which is regarded as the most comprehensive record of the Earth's seismicity. From it, we extracted a list of hypocentres with  $M_w$  from a multitude of agencies reporting data to the ISC. We first summarize the main temporal-spatial features of the  $M_w$  provided by global agencies (i.e., providing results for moderate to great earthquakes worldwide) and regional ones (i.e., also providing results ~~or~~ for small earthquakes in a specific area). Then we discuss their comparisons, not only by considering  $M_w$  but also the surface wave magnitude  $M_S$  and short-period body wave magnitude  $m_b$ . By using the Global Centroid Moment Tensor solutions as authoritative global agency, we identify regional agencies that best complement it and show examples of frequency-magnitude distributions in different areas obtained both from the Global Centroid Moment Tensor alone and complemented by  $M_w$  from regional agencies. The work done by the regional agencies in terms of  $M_w$  is fundamental to improve our understanding of the seismicity of an area and we call for the implementation of procedures to compute  $M_w$  in a systematic way in areas currently not well covered in this respect, such as vast parts of continental Asia and Africa. In addition, more studies are needed to clarify the causes of the apparent overestimation of global  $M_w$  estimations compared to regional  $M_w$ . Such difference is also observed in the comparisons of  $M_w$  with  $M_S$  and  $m_b$ . The results presented here are obtained from the dataset (Di Giacomo and Harris, 2020, <https://doi.org/10.31905/J2W2M64S>) stored at the ISC Dataset Repository ([www.isc.ac.uk/dataset\\_repository/](http://www.isc.ac.uk/dataset_repository/)).

## 1 Introduction

Among the different magnitude scales developed over the years to measure an earthquake's size, the moment magnitude  $M_w$  introduced by Kanamori (1977) and Hanks and Kanamori (1979) has a fundamental role in seismology. ~~It is~~ Although  $M_w$  alone is not able to fully characterize the energy release of an earthquake (e.g., Choy and Boatwright, 1995; Di Giacomo et al., 2010), it is considered the most reliable and, as such, the reference earthquake magnitude in different areas of research in seismology and geophysics (e.g., earthquake source studies, tsunamis, tectonics and geodynamics) and related applications (e.g., ground-

motion prediction equations, site effects and seismic hazard). Its computation relies on reliable ~~estimation~~estimation of the scalar seismic moment  $M_0$  (Aki, 1966) via the relationship (e.g., IASPEI, 2013):  $Mw = \frac{2}{3} \cdot (\log_{10} M_0 - 9.1)$ , with  $M_0$  given in Nm. There are several methodologies to obtain  $M_0$  (Lee and Engdahl, 2015). The most popular are based on moment tensor inversion from seismic recordings (Gilbert and Dziewonski, 1975), initially applied to earthquakes with  $Mw$  above 5-5.5, now  
 30 expanded to smaller earthquakes recorded at regional distances (Dreger and Helmberger, 1993). Other techniques, instead, use spectral analysis (Andrews, 1986) to obtain  $M_0$  and other source parameters (e.g., stress drop, corner frequency, Brune, 1970). Such techniques are useful for earthquakes recorded in the local distance range as they allow  $M_0$  computation for small earthquakes.

Since ~~its introduction~~the introduction of  $Mw$  many research groups developed techniques to routinely compute  ~~$Mw$~~ it for  
 35 monitoring and/or research purposes. Some seismological agencies systematically compute  $Mw$  on a global scale and, in recent years, more at regional scale (i.e., magnitude 5 and below in a specific area). As part of the mission of the International Seismological Centre (ISC, [www.isc.ac.uk](http://www.isc.ac.uk)) to collect, integrate, review and reprocess seismic bulletins from seismological agencies around the world, the ISC Bulletin (International Seismological Centre, 2020) is, to our knowledge, the most comprehensive resource where researchers interested in  $Mw$  can combine the information from global agencies and regional ones over several  
 40 decades (details in the following sections).

With the completion in early 2020 of the Rebuild project (Storchak et al., 2017, 2020) of the ISC Bulletin, here we provide an overview of the  $Mw$  content in the rebuilt ISC Bulletin and discuss some of its features. In particular, we outline the spatial and temporal properties of  $Mw$  from global and regional agencies (Section 2) and then discuss their comparisons (Section 3) and characteristics of  $Mw$  with the ISC re-computed surface wave magnitude  $MS$  and short-period body-wave magnitude  $mb$   
 45 (Section ~~??~~4). Finally, we discuss the feasibility of complementing regional  $Mw$  to global ones by showing the Gutenberg-Richter distribution in some areas where regional  $Mw$  is available for a long period of time (Section 5).

## 2 $Mw$ in the ISC Bulletin

~~As mentioned earlier, the~~The ISC Bulletin (International Seismological Centre, 2020) contains the  $Mw$  from a multitude of seismological agencies around the world~~(readers familiar with the ISC Bulletin content in terms of  $Mw$  may skip this section and go directly to Section ??)~~. Each agency contributing data to the ISC Bulletin is identified with a code and their details can  
 50 be found at [www.isc.ac.uk/iscbulletin/agencies](http://www.isc.ac.uk/iscbulletin/agencies). The aim of this work is not to outline the different techniques adopted by each agency to compute  $Mw$ . Such techniques have been extensively documented in scientific literature and readers should refer to the citations (if ~~any~~ available) for more information on the technique of a specific agency.

Without repeating the whole process behind the production of the ISC Bulletin (see, e.g., Section 3 of International Seis-  
 55 mological Centre, 2013 for a detailed overview), here we recall that the ISC, to begin with, groups the reported hypocentres and related data (e.g., arrival times, amplitudes, nodal planes, moment tensors etc.) by physical event. Then, usually 24 to 30 months behind real-time, the ISC analysts review the Bulletin ~~(on a monthly batch basis)~~ by assessing the location and magnitude (Bondár and Storchak, 2011) of ~~the largest events (normally events with a~~selected events (usually with magnitude above

3.5) and running a series of checks, some of which include the unreviewed events (e.g., events too small and often reported by a single agency). During the review process, among other changes, events may be banished, merged or split, hypocentres (and possibly related data) may be re-associated or, in exceptional cases, deprecated. The final product is a bulletin containing the ISC relocations (if the event has been relocated) in addition to the results (e.g., hypocentres, centroid locations, magnitudes) of contributing agencies. ~~As such the ISC Bulletin is considered the most comprehensive record of the Earth's seismicity and the starting (raw) dataset for many studies.~~

The ISC Bulletin 1964-2017 contains over 7 million events, and about 1.9 million of those have been reviewed. As we focus on  $M_w$  in this work, we extracted from the ISC Bulletin (1964-2017) a list of hypocentres with  $M_w$  from reporting agencies (the ISC does not currently compute  $M_w$ ). This dataset is freely available at the ISC Dataset Repository at <http://doi.org/10.31905/J2W2M64S> (Di Giacomo and Harris, 2020) and ~~represents the seed input for all~~ is the input for most of the results shown in the following sections. For simplicity, hereafter we refer to this dataset as the “DH  $M_w$  List”. Details on how we created the list of  $M_w$  entries from the ISC Bulletin as well as the explanation of the parameters included can be found in Section 7. The DH  $M_w$  List starts in 1964 (official starting year of the ISC) and stops in 2017 (coinciding with the last complete calendar year of the reviewed ISC Bulletin at the time of writing).  $M_w$  are obviously available in the ISC Bulletin from 2018 to present and also before 1964 but they are not considered here.

The DH  $M_w$  List contains 210,929 entries belonging to 179,112 earthquakes. Of those earthquakes 42,478 have  $M_w > 5.0$ . The ISC Bulletin 1964-2017 contains about 66,000 earthquakes with ISC  $mb > 5.0$  and about 545,000 with ISC  $mb < 5$ . Hence,  $M_w$ , despite being the preferred magnitude scale by the seismological community, is ~~available only for a small~~ not available for a significant fraction of the Earth's seismicity (see also Di Giacomo and Storchak, 2016). In total, 89 different  $M_w$  authors (hereafter we use agency and magnitude author interchangeably) are included in DH  $M_w$  List, ~~and~~ Table 1 lists the  $M_w$  agency details along with the methodology used (to the best of our knowledge), whereas their timeline is shown in Fig. 1. Only a few agencies report  $M_w$  systematically or with few gaps over several years. Those include the solutions at global scale of the Global Centroid Moment Tensors project (GCMT, [www.globalcmt.org](http://www.globalcmt.org), Dziewonski et al., 1981; Ekström et al., 2012), the National Earthquake Information Center of the US Geological Survey (NEIC, <https://earthquake.usgs.gov/earthquakes/search/>, e.g., Benz and Herrmann, 2014), and, at regional scale, the National Research Institute for Earth Science and Disaster Prevention (NIED, [Fukuyama et al., 1998](https://www.fnet.bosai.go.jp/top.php), <https://www.fnet.bosai.go.jp/top.php>) and the Institute of Earth Sciences, Academia Sinica (ASIES, <http://www.earth.sinica.edu.tw/>, Kao et al., 1998; Kao and Jian, 1999). Also, in the last ~20 years there has been an increase in the agencies reporting  $M_w$  to the ISC, particularly in the Americas. In the following sections we look in more detail at the agencies reporting  $M_w$  to the ISC first at global scale and then the ones operating at regional scale.

## 2.1 $M_w$ from global agencies

The two long-running agencies reporting  $M_w$  systematically to the ISC for earthquakes occurring anywhere in the world are GCMT and NEIC. In addition, after the great Sumatra earthquake of 26 December 2004, many agencies developed fast procedures to compute  $M_w$  soon after the earthquake occurrence. Hence, also other agencies started computing  $M_w$  for global earthquakes. Among such agencies, the Institut de Physique du Globe de Paris (IPGP, <http://www.ipgp.fr/>, Vallée et al., 2010;

Vallée, 2013) started to report to the ISC. In the following we give a brief summary of the  $M_w$  contribution to the ISC Bulletin of these agencies. Our aim is not to assess the magnitude of completeness of the  $M_w$  reporters, but simply to highlight their main features.

Seismologists are very familiar with the  $M_w$  provided by GCMT, and its use is quite common in the scientific literature (see, e.g., Yoder et al., 2012, for an assessment of GCMT completeness). Its formal start is in 1976, and it was initiated by the University of Harvard, USA (Dziewonski et al., 1981). Since summer 2006 the GCMT project is operated at the Lamont-Doherty Earth Observatory of Columbia University (Ekström et al., 2012). Fig. 2 is a summary plot showing the GCMT centroid locations along with the timeline, magnitude histograms and the number of events per year. We will show such a plot for different agencies to summarize the time and spatial coverage of an agency as well as the  $M_w$  range. The GCMT solutions pre-1976 are only for deep (Huang et al., 1997) and intermediate-depth (Chen et al., 2001) earthquakes, and from 1977 to 2004 it contains mostly earthquakes with  $M_w$  5.0 and above. From 2004-2005 GCMT also computed moment tensors and  $M_w$  for earthquakes down to 4.5 or even lower as obtained from special studies (see Nettles and Hjörleifsdóttir, 2010, and further references at <https://www.globalcmt.org/Events/>). Due to its long-term and highly homogenous solutions, GCMT is ~~normally~~ considered the most authoritative  $M_w$  agency for earthquakes worldwide and used as the reference magnitude in many seismological studies.

Soon after the earthquake occurrence and before the final GCMT solution is available, however, the  $M_w$  solution of the NEIC, IPGP and others are often used as the reference estimation of an earthquake magnitude. Fig. 3 shows the summary of the NEIC  $M_w$  available in the ISC Bulletin up to 2017. It has to be pointed out that currently the NEIC may obtain  $M_w$  using different approaches: the  $M_{ww}$  (Hayes et al., 2009) from W-phase (Kanamori, 1993) inversion; the  $M_{wb}$  from body-wave inversion (based on Ammon et al., 1998, and expanded for teleseismic distances); the  $M_{wc}$  from long-period surface wave inversion (see Polet and Thio, 2011, and references therein). In addition, NEIC bulletins may also include the  $M_{wr}$  from different contributors as obtained from the inversion of regional recordings (see  $M_{wr}$  section at <https://earthquake.usgs.gov/data/comcat/data-products.php>). The  $M_w$  from NEIC does not specify the type for earthquake data prior to August 2013 in the ISC Bulletin. ~~In Appendix A are included~~ Appendix A contains the summary plots from August 2013 for  $M_{ww}$  (Fig. A1),  $M_{wb}$  (Fig. A2),  $M_{wc}$  (Fig. A3) and  $M_{wr}$  (Fig. A4). Fig. 3 shows that the NEIC  $M_w$  solutions increase in number over the years, in particular in the last ten. This is mostly due to the inclusion of  $M_{wr}$  (Fig. A4) from different contributors, with  $M_{wr}$  available even for earthquakes down to magnitude 3. Differently from the regional contributors we consider in Section 2.2,  $M_{wr}$  NEIC is not restricted to a well-defined region, as it is available for earthquakes in the Americas, Euro-Mediterranean area and other parts of Asia and the Pacific ocean.

Fig. A5 in Appendix A shows the summary plots for IPGP, which reports earthquakes with magnitude 5.8 and above, predominantly from subduction zones.

~~We point out that also the Geophysical Survey of Russian Academy of Sciences (MOS, , ?) computes  $M_w$  for large earthquakes (5.5 and above, mostly in Asia) However, since the MOS contribution (123 earthquakes in total) is small compared to other global agencies, we do not include MOS in the discussion.~~ The comparison between  $M_w$  from GCMT, NEIC and IPGP will be discussed in Section ~~???~~3.

## 2.2 $M_w$ from regional agencies

At regional scale several agencies report  $M_w$  during different periods (Fig. 1) and in different parts of the world (Fig. 4). The bounding boxes of Fig. 4 are drawn from the hypocentres included in the DH  $M_w$  List and are not meant as limits of the area investigated by an individual agency. For sake of brevity here we do not include summary plots for each agency (as shown in Fig. 2) but [we](#) give priority to major regional contributors currently active. However, readers interested in reproducing the summary plot for a specific agency or magnitude author can use the the DH  $M_w$  List and the script available in Di Giacomo and Harris (2020). More details to this regard are given in Section 7.

In North America, the major regional reporters to the ISC include the Canadian Hazards Information Service, Natural Resources Canada (agencies PGC and OTT, <http://www.earthquakescanada.nrcan.gc.ca/index-eng.php>, Fig. A6), the University of Alaska (UAF, <http://www.uaf.edu/geology/research/seismology-geodesy/>), and, via NEIC reports, Saint Louis University (SLM, <http://www.eas.slu.edu/Department/department.html>, Herrmann et al., 2011), Berkeley Seismological Laboratory (BRK and NCEDC, <http://seismo.berkeley.edu/seismo/>, hereafter referred to as BRK/NCEDC), California Institute of Technology (PAS, <http://www.seismolab.caltech.edu/>), and the Servicio Sismológico Nacional, Mexico (MEX, <http://www.ssn.unam.mx/>, Pérez-Campos et al., 2019), which resumed reporting  $M_w$  in 2017.

In the Caribbean and Central America, among the agencies actively reporting  $M_w$  to the ISC is the Instituto Nicaraguense de Estudios Territoriales (INET, <http://www.ineter.gob.ni/>, now reporting as CATAC, <http://catac.ineter.gob.ni/>, Fig. A7), Universidad de Panama (UPA, <http://www.geocienciaspanama.org/informacion-general-2>, Fig. A8) and Universidad de Costa Rica (UCR, <http://www.rsn.ucr.ac.cr/>, Fig. A9).

In South America major contributors are the Red Sismológica Nacional de Colombia (RSNC, <https://www.sgc.gov.co/>, Fig. A10), Fundación Venezolana de Investigaciones Sismológicas (FUNV, <http://www.funvisis.gob.ve/>, Fig. A11), Centro Sismológico Nacional, Universidad de Chile (GUC, <http://www.csn.uchile.cl/>, Fig. A12) and Instituto Nacional de Prevención Sísmica (SJA, <http://www.inpres.gov.ar/>, Sánchez et al., 2013, Fig. A13).

In the European-Mediterranean area, several agencies over the years reported  $M_w$  to the ISC (not all shown in Fig. 4). Among the active  $M_w$  reporters, the most continuous is the European-Mediterranean Regional Centroid-Moment Tensors (MED\_RCMT, <http://rcmt2.bo.ingv.it/>, Pondrelli, 2002, Fig. 5), which largely overlaps both in space and time with currently reporting agencies (AFAD, <http://www.deprem.gov.tr/>, Alver et al., 2019; BER, <http://www.geo.uib.no/seismo/>, Ottemöller et al., 2018; ROM, <http://www.ingv.it/>, Scognamiglio et al., 2006) and other agencies currently not reporting to the ISC (e.g., ZUR\_RMT, IPRG and GII, ATA, NIC). The  $M_w$  from the Instituto Andaluz de Geofísica (IAG, <http://www.ugr.es/~iag/>, Stich et al., 2003, 2006, 2010; Martín et al., 2015) and GEOMAR (GEOMR, <https://www.geomar.de/>, Grevemeyer et al., 2015) have been included after the Rebuild project of the ISC Bulletin (Storchak et al., 2017, 2020) from results in journal publications.

With the exception of North African earthquakes reported by MED\_RCMT, no active regional agency is reporting  $M_w$  to the ISC in most of Africa. Past contributions come from the work of Hofstetter and Beyth (2003, and references therein, in the ISC Bulletin under agency AFAR), and the Council for Geoscience in South Africa (PRE, <https://www.geoscience.org.za/>) for 2003-2005.

In Asia, the two largest and continuous  $M_w$  contributors are NIED (Fig. 6) for the Japanese archipelago and ASIES (Fig. 7) for the Taiwan island region. Smaller contributions in terms of  $M_w$  come from the National Centre for Seismology (NDI, <https://seismo.gov.in/>) for the Indian subcontinent (Fig. A14) and the Badan Meteorologi, Klimatologi dan Geofisika (DJA, <https://www.bmkg.go.id/gempabumi/gempabumi-terkini.bmkg?lang=EN> for the Indonesian archipelago (Fig. A15). These last two agencies started to contribute more systematically since August 2017 and January 2017, respectively.

In Oceania, the only regional contributor is the Institute of Geological and Nuclear Sciences (WEL, <http://www.gns.cri.nz/>), mostly for the area surrounding New Zealand's North and South islands (Fig. A16).

Overall, the contribution of regional agencies to the ISC is important for expanding the  $M_w$  data for earthquakes not usually considered by global agencies (i.e., about magnitude 5 and below). We have seen that regional agencies can cover from relatively small areas (e.g., BRK/NCEDC, PAS, UAF) to large ones (e.g., NIED, SLM, SJA, MED\_RCMT) and that from a temporal point of view many more regional agencies started computing  $M_w$  in the last 10-20 years, although gaps are present and some agencies stopped reporting or are no longer active.

In the context just described, we give special attention in the following sections to NIED and ASIES in Asia, MED\_RCMT in the European-Mediterranean region and the above mentioned agencies in the Americas that currently report  $M_w$  to the ISC.

### 3 $M_w$ comparisons

In this section we show the comparisons between  $M_w$  GCMT (as the most homogenous and long-running agency for global earthquakes) with NEIC and selected regional agencies. The aim of such comparisons is to show the variability in  $M_w$  estimates for global and regional events. The figures shown in the following also include the orthogonal regression (e.g., Bormann et al., 2007, and references therein). The regression results from this work are not meant to be used as authoritative formulas for magnitude conversions but are only shown for guidance to highlight similarities and/or the most significant differences in the magnitude comparisons shown here.

#### 3.1 $M_w$ GCMT and $M_w$ NEIC

As shown in Section 2, NEIC can report different types of  $M_w$ :  $M_{ww}$ ,  $M_{wb}$ ,  $M_{wc}$ ,  $M_{wr}$ . However, only ~~with data starting in~~ from August 2013 ~~do the NEIC reports to the ISC specify in the  $M_w$  type the reports from NEIC specify the~~ procedure used to obtain ~~it~~ $M_w$ . For this reason, we compare  $M_w$  GCMT and NEIC before August 2013 (generic  $M_w$ ) and from August 2013 for NEIC  $M_{ww}$ ,  $M_{wc}$  and  $M_{wb}$  (Fig. 8). The comparison with  $M_{wr}$  will be included in Section 3.3.6. Overall, the agreement between GCMT and NEIC  $M_w$  is very good, both in the period 1980-2013/07 and 2013/08-2017, as the average difference is within 0.1 magnitude units (m.u.) with 0.1 standard deviation. However, some features can still be seen, as already pointed out by Gasperini et al. (2012). Indeed, Fig. 8 shows how GCMT and NEIC agree well particularly in the magnitude range 5 to 7, whereas GCMT, with a few exception, is marginally larger than NEIC for earthquakes below 5 and above 7. In recent years, however, Fig. 8 shows how NEIC and GCMT  $M_w$  fit each other very well, particularly ~~for what concerns~~ with NEIC's  $M_{ww}$ ,  $M_{wc}$  and  $M_{wb}$ .



### 3.2 $M_w$ GCMT and $M_w$ IPGP

195 ~~The need for promptly computing  $M_w$  after an earthquake to assess its impact, particularly in terms of its tsunami potential, resulted in the implementation of fast procedures to compute  $M_w$  for earthquakes worldwide at the IPGP.~~ Fig. A17 shows the comparison between  $M_w$  from GCMT and IPGP. The  $M_w$  from IPGP shows ~~a~~ slightly larger values than GCMT, ~~at times~~ sometimes by up to 0.4 m.u. However, IPGP in general follows GCMT well along the 1:1 line and is confirmed to be an important asset for the community when it comes to rapidly assessing  $M_w$ .

### 200 3.3 $M_w$ GCMT and $M_w$ from regional agencies

Since the  $M_w$  from global agencies shows very good agreement at global level, here we use the authoritative  $M_w$  from GCMT for the comparisons with  $M_w$  from regional agencies. We ~~start with~~ consider  $M_w$  from active agencies in the Americas (North, Central and South), ~~before~~ the Euro-Mediterranean area and the areas around Japan (agency NIED) and Taiwan island (agency ASIES). Finally, we give a quick overview for other agencies ~~Agencies from~~ excluding the Caribbean (SDD, JSN, SSNC)   
 205 that have insufficient data to create comparisons with GCMT as well as  $m_b$  and  $M_S$  from the ISC. ~~Therefore we do not include Caribbean agencies in the following sections.~~

As GCMT provides  $M_w$  mostly for earthquakes with magnitude 5.0 and above (see Fig. 2), the  $M_w$  shown in the following comparisons are mostly for moderate (i.e.,  $M_w$  between 5 and 6) ~~to great (i.e.,  $M_w$  8+)~~ and larger earthquakes. The comparisons shown here also serve to establish a hierarchy in the preference of regional agencies when there are spatial overlaps, such as in   
 210 Central America (see Fig. 4). We will make use of such preferences in Section 5.

#### 3.3.1 North America

Among the ~~the~~ regional agencies reporting  $M_w$  to the ISC in North America (Fig. 4), we show the comparisons with  $M_w$  GCMT for agencies PGC/OTT, BRK/NCEDC, PAS and SLM. All of those agencies use regional waveform inversion methodologies (Table 1). We do not consider in this section UAF and MEX as we have only a few events in common with GCMT ~~from~~   
 215 in the DH  $M_w$  List. Fig. 9 shows that, overall,  $M_w$  GCMT is marginally (about 0.1 m.u.) larger than  $M_w$  ~~from~~ given by North American agencies. Agencies PAS and BRK/NCEDC show a good agreement with GCMT as the orthogonal regression closely follows the 1:1 line, although with an average difference of about 0.1 m.u., whereas for PGC/OTT the scatter is larger, particularly for moderate earthquakes and below, and SLM seems offset by -0.1 m.u. from GCMT. For North America therefore the regional  $M_w$  preference is PAS with BRK/NCEDC, followed by PGC/OTT.

#### 220 3.3.2 Central America

Among the ~~the~~ regional agencies reporting  $M_w$  to the ISC in Central America (Fig. 4), we show the comparisons with  $M_w$  GCMT for agencies INET/CATAC, UCR and UPA. We are not aware of the procedures used by those agencies to obtain  $M_w$  (Table 1). Fig. 10 shows large differences between  $M_w$  GCMT and  $M_w$  from INET/CATAC and UCR. Agency UPA shows a better agreement with GCMT (~14% of the GCMT - UPA  $M_w$  values differ by more than  $\pm 0.5$  m.u.), although large differences

225 of about 1 m.u. can occur. Agency INET/CATAC has a significant average difference with GCMT of about 0.4 m.u., whereas UCR shows a distribution similar to PGC/OTT but with larger scatter and variability (average difference = 0.2 m.u.). For this area, we will use the results from agency UPA in the following sections.

### 3.3.3 South America

Among the ~~the~~-regional agencies reporting  $M_w$  to the ISC in ~~Central~~South America (Fig. 4), we show the comparisons with  
230  $M_w$  GCMT for agencies RSNC, ~~FUNV, GUC~~GUC, FUNV and SJA. ~~Agency SCB has only 4 earthquakes in common with GCMT and is therefore not discussed here~~The latter two use spectral analysis to obtain  $M_w$ , whereas we have no record of the procedures used by RSNC and GUC (Table 1). The  $M_w$  comparisons shown in Fig. 11 highlights a good fit between GCMT and ~~the Chilean~~ agency GUC for the whole magnitude range. Agency SJA ~~, which largely overlaps with GUC,~~ shows significant deviations from GCMT in the whole magnitude range. It is more difficult to assess agency RSNC and FUNV for paucity of  
235 data (total number of points ~~=~~is 60 and 56, respectively). However, we note that RSNC shows a scatter similar to PGC/OTT for moderate earthquakes and agrees well with GCMT for strong ( $M_w$  between 6 and 7) to major ( $M_w$  between 7 and 8) earthquakes, whereas FUNV shows a larger scatter. Since the areas considered by GUC and SJA as well as RSCN and FUNV overlap to some extent, we give preference to GUC over SJA and to RSNC over FUNV.

### 3.3.4 Euro-Mediterranean area

240 This area ~~in~~is one of the best-monitored in the world, as several agencies report or have reported  $M_w$  to the ISC (see Fig. 4). Features of the  $M_w$  computed by MED\_RCMT, ZUR\_RMT and ROM are already discussed in recent literature (~~e.g., Konstantinou and Rontogianni, 2011; Gasperini et al., 2012,~~)(e.g., Konstantinou and Rontogianni, 2011; Gasperini et al., 2012). For the sake of simplicity, here we focus on the  $M_w$  from MED\_RCMT as it is the most long-running and consistent active reporter to the ISC in this area. The left subplot in Fig. 12 shows its  $M_w$  comparison with GCMT. Over about 20 years of  
245 data, we notice the good fit between GCMT and MED\_RCMT over the whole magnitude range, and generally we confirm the findings of Gasperini et al. (2012). Indeed, also for MED\_RCMT, as for regional  $M_w$  cases discussed earlier, we notice the tendency of  $M_w$  to be ~~generally~~ smaller than GCMT for earthquakes at lower magnitudes.

We ~~also~~ checked the comparisons of the other agencies actively reporting in this area (Fig. 4) and found that IAG ( $M_w$  from publications, see text for details) is in very good agreement with GCMT, whereas  $M_w$  from AFAD and ROM also show  
250 the usual feature of having  $M_w$  progressively smaller than GCMT going from strong ( $M_w$  between 6 and 7) to ~~moderate and~~ light ( $M_w$  between 4 and 5) earthquakes. Finally, large differences are present for agency NIC (not actively reporting  $M_w$ ), whereas not enough points are available for GEOMR, ATA, BER, IPRG/GIL. In this context we give preference to  $M_w$  from MED\_RCMT for the entire Euro-Mediterranean area.



### 3.3.5 Japanese islands (NIED) and Taiwan island (ASIES) areas

255 NIED and ASIES are authoritative agencies for the Japanese archipelago and the region around Taiwan island, respectively. Both agencies show an excellent agreement with GCMT (Fig. 12). We note that among the biggest regional contributors, NIED does not show the common trend of regional  $M_w$  to be smaller than GCMT for lower magnitudes. ASIES shows such a trend but it appears less prominent compared to other regional agencies.

### 3.3.6 Other agencies

260 Among the other agencies reporting  $M_w$ , we show in Fig. A18 the comparison of GCMT with DJA, WEL and  $M_{wr}$  NEIC. WEL reports to the ISC in terms of  $M_w$  are somewhat discontinuous, but they fit well with GCMT. Also for DJA the reports are discontinuous and characterized by a subset of events with  $M_w$  smaller than GCMT and another subset of events with  $M_w$  larger than GCMT. Further investigations in this respect are beyond the scope of this work. Similar to other regional agencies, the  $M_{wr}$  included in NEIC reports appears to be progressively smaller than  $M_w$  GCMT as the earthquake magnitude decreases.

265 Due to the discontinuous nature of the DJA and WEL reports and the overlap of  $M_{wr}$  included in NEIC reports with other regional agencies, in the following sections we focus our attention to agencies in the Americas, MED\_RCMT, NIED and ASIES.

## 4 Comparisons of $MS$ and $mb$ from the ISC with $M_w$

We have seen in previous sections that  $M_w$  GCMT and several regional  $M_w$  providers fit well for strong and major earthquakes, whereas for moderate and smaller earthquakes the variability of the differences between GCMT and regional  $M_w$  values is higher, with GCMT nearly always larger than regional  $M_w$  values. This observation is not new as, for example, Patton (1998) and Patton and Randall (2002) showed the tendency of GCMT to overestimate seismic moments (hence of  $M_w$ ) in central Asia, particularly for lower magnitude earthquakes. It is not the scope of this work to further investigate the reasons for such differences (see, e.g., [Hjörleifsdóttir and Ekström, 2010](#))([Hjörleifsdóttir and Ekström, 2010](#)), as our main aim is to highlight

275 [large some](#) features of the  $M_w$  from the ISC Bulletin as an instrumental resource for further research into  $M_w$ .

Fig. 2 shows how GCMT, although it is the authoritative agency for global earthquakes, is not systematically computing  $M_w$  for earthquakes below 5. Therefore, to further assess the variability of the regional  $M_w$  providers at lower magnitudes, we use the ISC re-computed  $MS$  and  $mb$  (Bondár and Storchak, 2011).

~~The global comparisons between GCMT  $M_w$  and~~ [The main reasons to use](#) ISC re-computed  $MS$  and  $mb$  ~~have been extensively~~

280 ~~discussed in literature. here are:~~ [1\) they provide many more data points below magnitude 5 than the GCMT dataset; 2\) they are often used as basis for deriving proxy  \$M\_w\$  \(e.g., Scordilis, 2006; Lolli et al., 2014; Di Giacomo et al., 2015\).](#)

In Fig. 13 and Fig. 14 we show, for each regional agency discussed in previous sections, the comparisons between ISC re-computed  $MS$  and  $mb$ , respectively, with GCMT and each regional agency (the only difference here is that we grouped PAS with BRK/NCEDC). The global comparisons between GCMT  $M_w$  and ISC re-computed  $MS$  and  $mb$  have been extensively

285 discussed in literature. Therefore, Fig. 13 and Fig. 14 only include GCMT  $M_w$  values for earthquakes that occurred in the same area of the corresponding regional agency (see Fig. 4 for the spatial limits of each agency).

Fig. 13 and Fig. 14 also show the non-linear regressions between ISC magnitudes and GCMT as well as regional  $M_w$  agencies. The non-linear regressions have been computed similarly to Di Giacomo et al. (2015), with the difference being that in this work we did not use a global dataset split in training and validation subsets. Other non-linear models have been proposed  
290 by Lolli et al. (2014) but, as we do not aim to create new conversion relationships, we only use our non-linear regressions to discuss features of the ISC re-computed  $MS$  and  $mb$  with GCMT and regional agencies.

The non-linear models for regional agencies shown in Fig. 13 and Fig. 14, obtained with the same regression technique, serve us as a sort of guideline for earthquakes below magnitude 6 in particular, as for large earthquakes the  $MS$  and  $mb$  relations with  $M_w$  have been studied by several authors (~~e.g., see Bormann et al., 2013, for a comprehensive overview on the subject~~)(e.g., Bormann et al.)

295 Several papers have shown that  $MS$  scales with  $M_w$  better than  $mb$  for strong and larger earthquakes (e.g., Scordilis, 2006). This is also confirmed by inspecting Fig. 13. Indeed, the  $MS$  ISC and  $M_w$  GCMT distribution shows how the non-linear model follows close the 1:1 line ~~for in~~ the magnitude range ~~6.0 to~~ between  $\sim 5.6$  and  $\sim 7.7$ , whereas for great earthquakes  $MS$  tends to underestimate  $M_w$  (Kanamori, 1983) and deviates even more significantly from the 1:1 line going down in magnitude for moderate and smaller earthquakes (see also Bormann et al., 2009). Similar trends can be seen for agencies MED\_RCMT, NIED,  
300 ASIES, PGC/OTT, BRK/NCEDC and PAS, UPA and GUC, although the non-linear models below 6 are much closer to the 1:1 line than the GCMT model. This is not surprising considering the  $M_w$  comparisons that showed how  $M_w$  GCMT is generally larger than those agencies for moderate earthquakes and below. Larger deviations are observed for the other agencies. Overall, the regional  $MS$  -  $M_w$  distributions appear to complement the global  $MS$  -  $M_w$  distribution well, although regional variations are present (compare, e.g., MED\_RCMT and ASIES), as already pointed out by Ekström and Dziewonski (1988). The difference  
305 between  $MS$  ISC and  $M_w$  GCMT and all other agencies is also shown as box-and-whisker plot for bins of 0.2 m.u. of  $MS$  ISC (last subplot in Fig. 13). Despite the large scatter of  $M_w$  shown by regional agencies, such differences become progressively larger as the magnitude decreases.

The comparison between  $mb$  ISC and  $M_w$  GCMT is characterized by a large scatter in the whole magnitude range and shows stronger features compared to  $MS$ . Indeed, due to the early saturation of  $mb$  already for strong to major earthquakes  
310 (~~e.g., Kanamori, 1983~~)(Kanamori, 1983),  $M_w$  is, in general, significantly larger than  $mb$ . This feature is well documented in the literature, hence we focus on the significant difference between GCMT and the other agencies for lower magnitude earthquakes. Indeed, whilst the GCMT distribution with  $mb$  is strongly non-linear, for all other agencies the non-linear models are much closer to the 1:1 line than the GCMT curve. In particular, agencies MED\_RCMT and ASIES appear to extend nearly linearly the  $mb$  -  $M_w$  global distribution from the GCMT. Similar trends can be noticed for NIED and PGC/OTT, although  
315 with a larger scatter, whereas for other agencies the number of data points are significantly smaller and the regional  $mb$  -  $M_w$  distribution appears to complement the global  $mb$  -  $M_w$  distribution less clearly. As for  $MS$ , we observe a significant difference between  $mb$  -  $M_w$  from GCMT and all other agencies for smaller earthquakes (last subplot in Fig. 14).

## 5 Examples of frequency-magnitude distributions

As one of the possible uses of the ISC Bulletin as a source of  $M_w$ , Fig. 15 shows the frequency-magnitude distributions (FMD) for GCMT alone and GCMT complemented by regional agencies discussed above. The FMDs are ~~normally~~ used in many hazard studies and are fundamental in catalogue based assessments of the magnitude of completeness  $M_c$  for an area in a given time period. The FMDs have been obtained for the time period covered both by GCMT and the corresponding regional agency, as also outlined in the magnitude timelines of Fig. 15. The choice of the agency that best complement GCMT in a specific area has been discussed in previous sections. Fig. 15 also shows  $M_c$  estimations by two different methods, the median-based analysis of the segment slope by Amorese (2007) and the goodness-of-fit test by Wiemer and Wyss (2000). Other methods for estimating  $M_c$  are available (see, e.g., Mignan and Woessner, 2012), but here we only use these two methods to provide two independent estimations of  $M_c$  for GCMT and GCMT complemented by a regional agency. Overall, the effect of complementing the  $M_w$  from a regional agency with GCMT is to improve the  $M_c$  for an area, with the exception of Chile where the recent contribution by the regional agency GUC does not, yet, expand significantly the GCMT contribution.

We note significant fluctuations in the FMDs for all agencies shown for the Americas, as, for example, in California and neighbouring regions (agencies PAS/BRK-NCEDC), as also shown by the large discrepancy between the  $M_c$  from the goodness-of-fit test and median-based analysis of the segment slope methods. Agencies NIED, ASIES and MED\_RCMT extend to lower magnitudes the GCMT's FMDs better than other agencies. Such FMD examples further emphasize the important role of regional agencies in complementing global solutions (e.g., from GCMT).

## 6 Conclusions

The ISC Bulletin, in its rebuilt shape after the work described in Storchak et al. (2017, 2020), is a unique resource for seismological and multidisciplinary geoscience studies. In this work we focused on the content and features of the moment magnitude  $M_w$ , as it is possibly the preferred magnitude scale in the seismological community. The earliest records of  $M_w$  are for ~~for~~ deep and intermediate-depth earthquakes in the 1960s obtained from special studies by the GCMT group (Huang et al., 1997; Chen et al., 2001). Then, since ~~the formal start in 1976, GCMT (initiated by the University of Harvard, USA, Dziewonski et al., 1981)~~ GCMT has become the authoritative global agency providing  $M_w$  for moderate to great earthquakes. In recent decades other agencies also implemented procedures to compute  $M_w$  for global earthquakes (e.g., NEIC and IPGC), often due to the need for having a quick but reliable assessment of an earthquake's impact soon after its occurrence (e.g., Hayes et al., 2009; Vallée et al., 2010). We have summarized the main time and spatial features of the global  $M_w$  providers and by their comparisons we confirm the findings of previous works ~~(e.g., Gasperini et al., 2012)~~ (Gasperini et al., 2012). In brief, there is a very good agreement between such agencies for strong to great earthquakes, although minor differences are present.

In recent years, the computation of  $M_w$  has been expanded to ~~light and~~ smaller earthquakes by a multitude of agencies covering from small areas (i.e., country-wide) ~~or~~ to whole continents. The contributions ~~of from~~ regional agencies are fundamental for improving seismicity records of an area. To emphasize this point, Fig. 16 shows the summary of the contribution ~~of from~~ regional agencies if we exclude earthquakes with  $M_w$  from global agencies (the only exception is  $M_w$  from NEIC, which is

included in the figure). As regional agencies make up about 72% of the earthquakes in the DH  $M_w$  List, we remark the need for continuous and systematic  $M_w$  solutions to be provided over a long period of time, as such datasets will be fundamental tools for a better understanding of the seismicity of an area. It would also be desirable that agencies document the procedures used over time and whether automatic or revised solutions are obtained.

355 The time and spatial summaries of the regional agencies highlighted the recent increase in  $M_w$  providers, although the agencies currently active and having few interruptions in their contributions are located mostly in North America, Euro-Mediterranean, Japanese archipelago and Taiwan areas. Unfortunately, large parts of the world with significant seismicity (e.g., vast parts of continental Asia and Africa) lack regional agencies reporting  $M_w$  (see Fig. 4 and Fig. 16).

The  $M_w$  comparisons between GCMT and regional agencies showed a feature-characteristic already discussed in literature, 360 that is a growing deviation from the 1:1 line for moderate to smaller earthquakes. Such deviation is usually accompanied by a larger scatter in the data points compared to earthquakes in higher magnitude ranges (e.g., magnitude 6 and above). These observations are not limited to a specific area but appear to be common in different parts of the world. In addition, the GCMT  $M_w$  comparisons with the ISC-recomputed magnitudes,  $MS$  and  $mb$ , confirm such discrepancies. Indeed, GCMT appears nearly systematically larger than regional ones for earthquakes in the same area below about magnitude 5.5, as highlighted by the 365 nonlinear regressions shown in this work. Nearly all deviate from the 1:1 line more significantly for GCMT than corresponding models for regional agencies.

When multiple agencies overlap in space and time, we used magnitude comparisons to select individual regional agencies that better complement GCMT in a given area. This way we discussed examples of frequency-magnitude distributions from GCMT alone and GCMT complemented by specific regional agencies in different parts of the world. It is not surprising that by 370 complementing GCMT with the  $M_w$  of a regional agency we have shown improvements in  $M_c$  estimations. The best examples of extending the GCMT FMDs to smaller magnitudes are from agencies MED\_RCMT, NIED and ASIES, whereas in other areas the GCMT as well as the GCMT complemented by regional agencies show marked fluctuations. Although we did not aim to investigate in detail the frequency-magnitude distributions, a possible source of such fluctuations, e.g. for California, may be due to the short time window considered. Hence, we encourage agencies to continue or implement procedures for 375 systematically computing  $M_w$  for the years to come, so that future works may benefit from long-running and homogenous datasets.

Finally, we point out that further investigations on the difference between  $M_w$  from GCMT and regional agencies are desirable, although several papers (e.g., Patton, 1998; Patton and Randall, 2002; Hjörleifsdóttir and Ekström, 2010; Konstantinou and Rontogianni, 2011) considered this aspect. Addressing such discrepancies may have significant impacts in different types 380 of studies (e.g., magnitude conversion relationships, ground-motion prediction equations, hazard, etc.). In particular, we envisage studies that estimate the effects of possible data censoring in  $M_w$  computations in different regions, which may explain, even partially, the growing deviations from the 1:1 lines between  $M_w$  GCMT and  $mb|MS$  in the lower magnitude ranges.

## 7 Code and data availability

The DH  $M_w$  List (filename = MW\_all\_1964-2017, Di Giacomo and Harris, 2020) is available in the ISC Dataset Repository  
385 at <http://doi.org/10.31905/J2W2M64S>. It has been extracted from the ISC Bulletin (International Seismological Centre, 2020)  
and each line contains the following fields (as in the file header line):

event type (*etype*), ISC event identifier (*isc\_evid*), hypocentre identifier (*hypid*), hypocentre author (*h.author*), hypocentre  
author origin time (*OT*), hypocentre author latitude (*lat*), hypocentre author longitude (*lon*), hypocentre author depth (*depth*),  
magnitude type (*mtype*), magnitude author (*n.author*), magnitude (*mag*), magnitude uncertainty (*unc*), data provider (*reporter*),  
390 magnitude identifier (*magid*), prime location author (*prime*), absolute depth difference between *h.author* and *prime* (*Hdiff*, in  
km), epicentral distance between *h.author* and *prime* (*dist*, in km).

The database identifiers (*isc\_evid*, *hypid* and *magid*) are included for facilitating identification of entries from users. Note that  
for the same event (i.e., one *isc\_evid*) there can be from 1 to  $N$  *hypid* and *magid* entries. For some entries the *n.author* is  
different from the *h.author* as some reporters (e.g., NEIC) often provide magnitude values from third parties.

395 The entries included in the DH  $M_w$  List, as extracted from the ISC Bulletin, include only the following *mtype* (case insensi-  
tive):

*Mw*, *Mwb*, *Mwc*, *Mwr*, *Mww*. This means that *Mw* computed for rapid response purposes, such as *Mwp* (Tsuboi et al., 1995,  
1999; Tsuboi, 2000), *MwMwp* (Whitmore et al., 2002), *Mwpd* (Lomax et al., 2007) or proxy values such as *Mw(mB)* (Bormann  
and Saul, 2008), have been skipped.

400 Other *Mw* entries in the ISC Bulletin not included in the DH  $M_w$  List are those with associated uncertainty larger than 0.5  
(note that *unc* = 0 means no formal uncertainty is associated to the magnitude value). Finally, with the exception of *Mw* from  
GCMT, we skipped *Mw* entries where *dist* is larger than 300 km and *Hdiff* > 150 km.

Below are the Perl lines used to write out the DH  $M_w$  List:

```
405 $str = sprintf "%s %12d %12d %8s %s %9.3f %10.3f %6.1f %6s %12s %4.2f %3.1f %12s\n",  
    %12d %8s %8.1f %8.1f\n",  
    $etype , $evid , $hypid , $hauthor , $ot , $lat , $lon , $depth , $mtype , $nauthor ,  
    $magnitude , $unc , $reporter , $magid , $primeauthor , $diffdepth , $deltakm ;  
  
410 print OUT (" $str" ) ; # OUT is the DH Mw List in the manuscript , file name =  
    MW_all_1964-2017 in the ISC Dataset Repository , doi: 10.31905/J2W2M64S
```

In Di Giacomo and Harris (2020) we also include the Generic Mapping Tools (GMT4.5, Wessel et al., 2013) script to create  
the summary plots (as in Fig. 2 or Fig. 5 for any magnitude author the user may wish to visualize, as mentioned in Section 2.2).

Finally, users can find in dedicated subfolders (see README file in Di Giacomo and Harris, 2020) the files used to create  
415 the magnitude comparisons shown in this work.

*Author contributions.* DDG is the lead author and prepared the dataset and figures. JH maintains the database and ISC web services, and DAS obtained the funding for the work and established and maintained connections with many data providers. All the authors contributed to the manuscript and approved the final version.

*Competing interests.* The authors declare that they have no conflict of interest

420 *Acknowledgements.* We are grateful to all reporters that contribute or have contributed data to the ISC, particularly in terms of  $M_w$  for this work. The work done at the ISC is possible thanks to the support of its members (<http://www.isc.ac.uk/members/>, last access: December 2020) and sponsors (<http://www.isc.ac.uk/sponsors/>, last access: December 2020). [We thank Lars Ottemöller and an anonymous reviewer for their comments that helped us to improve the manuscript.](#) Work partially funded by NSF grants 1811737, 1417970 and 0949072; USGS Awards G14AC00149, G15AC00202, G18AP00035 and G19AS00033. All figures were drawn using the Generic Mapping Tools (Wessel  
425 et al., 2013).

## References

- Aki, K.: Generation and Propagation of G Waves from the Niigata Earthquake of June 16, 1964. Part 2. Estimation of earthquake moment, released energy, and stress-strain drop from the G wave spectrum, *Bulletin of the Earthquake Research Institute, University of Tokyo*, 44, 73–88, <http://hdl.handle.net/2261/12237>, 1966.
- 430 Alver, F., Ömer Kılıçarslan, Kuterdem, K., Türkoğlu, M., and Şentürk, M. D.: Seismic Monitoring at the Turkish National Seismic Network (TNSN), *Summ. Bull. Internatl. Seismol. Cent.*, 53, 41–58, <https://doi.org/10.31905/D9GRP8RD>, 2019.
- Ammon, C. J., Herrmann, R. B., Langston, C. A., and Benz, H.: Faulting Parameters of the January 16, 1994 Wyoming Hills, Pennsylvania Earthquakes, *Seismological Research Letters*, 69, 261–269, <https://doi.org/10.1785/gssrl.69.3.261>, 1998.
- Amorese, D.: Applying a Change-Point Detection Method on Frequency-Magnitude Distributions, *Bulletin of the Seismological Society of America*, 97, 1742–1749, <https://doi.org/10.1785/0120060181>, 2007.
- 435 Andrews, D. J.: Objective Determination of Source Parameters and Similarity of Earthquakes of Different Size, in: *Earthquake Source Mechanics*, edited by S. Das, J. B. and Scholz, C., pp. 259–267, American Geophysical Union, <https://doi.org/10.1029/gm037p0259>, 1986.
- Benz, H. M. and Herrmann, R. B.: Rapid Estimates of the Source Time Function and Mw using Empirical Green's Function Deconvolution, *Bulletin of the Seismological Society of America*, 104, 1812–1819, <https://doi.org/10.1785/0120130325>, 2014.
- 440 Bird, P.: An updated digital model of plate boundaries, *Geochemistry, Geophysics, Geosystems*, 4, 1027, <https://doi.org/10.1029/2001gc000252>, 2003.
- Bondár, I. and Storchak, D. A.: Improved location procedures at the International Seismological Centre, *Geophysical Journal International*, 186, 1220–1244, <https://doi.org/10.1111/j.1365-246x.2011.05107.x>, 2011.
- 445 Bormann, P. and Saul, J.: The New IASPEI Standard Broadband Magnitude mB, *Seismological Research Letters*, 79, 698–705, <https://doi.org/10.1785/gssrl.79.5.698>, 2008.
- Bormann, P., Liu, R., Ren, X., Gutdeutsch, R., Kaiser, D., and Castellaro, S.: Chinese National Network Magnitudes, Their Relation to NEIC Magnitudes, and Recommendations for New IASPEI Magnitude Standards, *Bulletin of the Seismological Society of America*, 97, 114–127, <https://doi.org/10.1785/0120060078>, 2007.
- 450 Bormann, P., Liu, R., Xu, Z., Ren, K., Zhang, L., and Wendt, S.: First Application of the New IASPEI Teleseismic Magnitude Standards to Data of the China National Seismographic Network, *Bulletin of the Seismological Society of America*, 99, 1868–1891, <https://doi.org/10.1785/0120080010>, 2009.
- Bormann, P., Wendt, S., and Di Giacomo, D.: Seismic Sources and Source Parameters, pp. 1–259, *Deutsches GeoForschungsZentrum GFZ*, [https://doi.org/10.2312/GFZ.NMSOP-2\\_CH3](https://doi.org/10.2312/GFZ.NMSOP-2_CH3), 2013.
- 455 Brune, J. N.: Tectonic stress and the spectra of seismic shear waves from earthquakes, *Journal of Geophysical Research*, 75, 4997–5009, <https://doi.org/10.1029/jb075i026p04997>, 1970.
- Chen, P.-f., Nettles, M., Okal, E. A., and Ekström, G.: Centroid moment tensor solutions for intermediate-depth earthquakes of the WWSSN–HGLP era (1962–1975), *Physics of the Earth and Planetary Interiors*, 124, 1–7, [https://doi.org/10.1016/s0031-9201\(00\)00220-x](https://doi.org/10.1016/s0031-9201(00)00220-x), 2001.
- 460 Choy, G. L. and Boatwright, J. L.: Global patterns of radiated seismic energy and apparent stress, *Journal of Geophysical Research: Solid Earth*, 100, 18 205–18 228, <https://doi.org/10.1029/95jb01969>, 1995.

- Di Giacomo, D. and Harris, J.: An Mw list from the Rebuilt ISC Bulletin (1964-2016), ISC Seismological Dataset Repository, <https://doi.org/10.31905/J2W2M64S>, 2020.
- Di Giacomo, D. and Storchak, D. A.: A scheme to set preferred magnitudes in the ISC Bulletin, *Journal of Seismology*, 20, 555–567, <https://doi.org/10.1007/s10950-015-9543-7>, 2016.
- Di Giacomo, D., Parolai, S., Bormann, P., Grosser, H., Saul, J., Wang, R., and Zschau, J.: Suitability of rapid energy magnitude determinations for emergency response purposes, *Geophysical Journal International*, 180, 361–374, <https://doi.org/10.1111/j.1365-246x.2009.04416.x>, 2010.
- Di Giacomo, D., Bondár, I., Storchak, D. A., Engdahl, E. R., Bormann, P., and Harris, J.: ISC-GEM: Global Instrumental Earthquake Catalogue (1900–2009), III. Re-computed MS and mb, proxy MW, final magnitude composition and completeness assessment, *Physics of the Earth and Planetary Interiors*, 239, 33–47, <https://doi.org/10.1016/j.pepi.2014.06.005>, 2015.
- Dreger, D. S. and Helmberger, D. V.: Determination of source parameters at regional distances with three-component sparse network data, *Journal of Geophysical Research: Solid Earth*, 98, 8107–8125, <https://doi.org/10.1029/93jb00023>, 1993.
- Dziewonski, A. M., Chou, T.-A., and Woodhouse, J. H.: Determination of earthquake source parameters from waveform data for studies of global and regional seismicity, *Journal of Geophysical Research: Solid Earth*, 86, 2825–2852, <https://doi.org/10.1029/jb086ib04p02825>, 1981.
- Ekström, G. and Dziewonski, A. M.: Evidence of bias in estimations of earthquake size, *Nature*, 332, 319–323, <https://doi.org/10.1038/332319a0>, 1988.
- Ekström, G., Nettles, M., and Dziewoński, A. M.: The global CMT project 2004–2010: Centroid-moment tensors for 13,017 earthquakes, *Physics of the Earth and Planetary Interiors*, 200-201, 1–9, <https://doi.org/10.1016/j.pepi.2012.04.002>, 2012.
- Fukuyama, E., Ishida, M., Dreger, D. S., and Kawai, H.: Automated Seismic Moment Tensor Determination by Using On-line Broadband Seismic Waveforms, *Zisin (Journal of the Seismological Society of Japan. 2nd ser.)*, 51, 149–156, [https://doi.org/10.4294/zisin1948.51.1\\_149](https://doi.org/10.4294/zisin1948.51.1_149), 1998.
- Gasperini, P., Lolli, B., Vannucci, G., and Boschi, E.: A comparison of moment magnitude estimates for the European-Mediterranean and Italian regions, *Geophysical Journal International*, 190, 1733–1745, <https://doi.org/10.1111/j.1365-246x.2012.05575.x>, 2012.
- Gilbert, F. and Dziewonski, A. M.: An application of normal mode theory to the retrieval of structural parameters and source mechanisms from seismic spectra, *Philosophical Transactions of the Royal Society of London. Series A, Mathematical and Physical Sciences*, 278, 187–269, <https://doi.org/10.1098/rsta.1975.0025>, 1975.
- Grevemeyer, I., Gràcia, E., Villaseñor, A., Leuchters, W., and Watts, A. B.: Seismicity and active tectonics in the Alboran Sea, Western Mediterranean: Constraints from an offshore-onshore seismological network and swath bathymetry data, *Journal of Geophysical Research: Solid Earth*, 120, 8348–8365, <https://doi.org/10.1002/2015jb012073>, 2015.
- Hanks, T. C. and Kanamori, H.: A moment magnitude scale, *Journal of Geophysical Research*, 84, 2348–2350, <https://doi.org/10.1029/jb084ib05p02348>, 1979.
- Havskov, J. and Ottemöller, L.: SeisAn Earthquake Analysis Software, *Seismological Research Letters*, 70, 532–534, <https://doi.org/10.1785/gssrl.70.5.532>, 1999.
- Havskov, J., Voss, P. H., and Ottemöller, L.: Seismological Observatory Software: 30 Yr of SEISAN, *Seismological Research Letters*, 91, 1846–1852, <https://doi.org/10.1785/0220190313>, 2020.
- Hayes, G. P., Rivera, L., and Kanamori, H.: Source Inversion of the W-Phase: Real-time Implementation and Extension to Low Magnitudes, *Seismological Research Letters*, 80, 817–822, <https://doi.org/10.1785/gssrl.80.5.817>, 2009.



- Herrmann, R. B., Benz, H., and Ammon, C. J.: Monitoring the Earthquake Source Process in North America, *Bulletin of the Seismological Society of America*, 101, 2609–2625, <https://doi.org/10.1785/0120110095>, 2011.
- Hjörleifsdóttir, V. and Ekström, G.: Effects of three-dimensional Earth structure on CMT earthquake parameters, *Physics of the Earth and Planetary Interiors*, 179, 178–190, <https://doi.org/10.1016/j.pepi.2009.11.003>, 2010.
- Hofstetter, R. and Beyth, M.: The Afar Depression: interpretation of the 1960–2000 earthquakes, *Geophysical Journal International*, 155, 715–732, <https://doi.org/10.1046/j.1365-246x.2003.02080.x>, 2003.
- Huang, W.-c., Okal, E. A., Ekström, G., and Salganik, M. P.: Centroid moment tensor solutions for deep earthquakes predating the digital era: the World-Wide Standardized Seismograph Network dataset (1962–1976), *Physics of the Earth and Planetary Interiors*, 99, 121–129, [https://doi.org/10.1016/s0031-9201\(96\)03177-9](https://doi.org/10.1016/s0031-9201(96)03177-9), 1997.
- IASPEI: Summary of Magnitude Working Group recommendations on standard procedures for determining earthquake magnitudes from digital data, [ftp://ftp.iaspei.org/pub/commissions/CSOI/Summary\\_WG\\_recommendations\\_20130327.pdf](ftp://ftp.iaspei.org/pub/commissions/CSOI/Summary_WG_recommendations_20130327.pdf), 2013.
- International Seismological Centre: Summary of the Bulletin of the International Seismological Centre, January - June 2010, <https://doi.org/10.5281/zenodo.998584>, 2013.
- International Seismological Centre: On-line Bulletin, <https://doi.org/10.31905/d808b830>, 2020.
- Kanamori, H.: The energy release in great earthquakes, *Journal of Geophysical Research*, 82, 2981–2987, <https://doi.org/10.1029/jb082i020p02981>, 1977.
- Kanamori, H.: Magnitude scale and quantification of earthquakes, *Tectonophysics*, 93, 185–199, [https://doi.org/10.1016/0040-1951\(83\)90273-1](https://doi.org/10.1016/0040-1951(83)90273-1), 1983.
- Kanamori, H.: W phase, *Geophysical Research Letters*, 20, 1691–1694, <https://doi.org/10.1029/93gl01883>, 1993.
- Kao, H. and Jian, P.-R.: Source Parameters of Regional Earthquakes in Taiwan: July 1995–December 1996, *Terrestrial, Atmospheric and Oceanic Sciences*, 10, 585, [https://doi.org/10.3319/tao.1999.10.3.585\(t\)](https://doi.org/10.3319/tao.1999.10.3.585(t)), 1999.
- Kao, H., Jian, P.-R., Ma, K.-F., Huang, B.-S., and Liu, C.-C.: Moment-tensor inversion for offshore earthquakes east of Taiwan and their implications to regional collision, *Geophysical Research Letters*, 25, 3619–3622, <https://doi.org/10.1029/98gl02803>, 1998.
- Konstantinou, K. I. and Rontogianni, S.: A Comparison of Teleseismic and Regional Seismic Moment Estimates in the European-Mediterranean Region, *Seismological Research Letters*, 82, 188–200, <https://doi.org/10.1785/gssrl.82.2.188>, 2011.
- Lee, W. H. and Engdahl, E. R.: Bibliographical search for reliable seismic moments of large earthquakes during 1900–1979 to compute MW in the ISC-GEM Global Instrumental Reference Earthquake Catalogue, *Physics of the Earth and Planetary Interiors*, 239, 25–32, <https://doi.org/10.1016/j.pepi.2014.06.004>, 2015.
- Lentas, K., Di Giacomo, D., Harris, J., and Storchak, D. A.: The ISC Bulletin as a comprehensive source of earthquake source mechanisms, *Earth System Science Data*, 11, 565–578, <https://doi.org/10.5194/essd-11-565-2019>, 2019.
- Lolli, B. and Gasperini, P.: A comparison among general orthogonal regression methods applied to earthquake magnitude conversions, *Geophysical Journal International*, 190, 1135–1151, <https://doi.org/10.1111/j.1365-246x.2012.05530.x>, 2012.
- Lolli, B., Gasperini, P., and Vannucci, G.: Empirical conversion between teleseismic magnitudes (mb and Ms) and moment magnitude (Mw) at the Global, Euro-Mediterranean and Italian scale, *Geophysical Journal International*, 199, 805–828, <https://doi.org/10.1093/gji/ggu264>, 2014.
- Lomax, A., Michelini, A., and Piatanesi, A.: An energy-duration procedure for rapid determination of earthquake magnitude and tsunami-genic potential, *Geophysical Journal International*, 170, 1195–1209, <https://doi.org/10.1111/j.1365-246x.2007.03469.x>, 2007.

- Martín, R., Stich, D., Morales, J., and Mancilla, F.: Moment tensor solutions for the Iberian-Maghreb region during the IberArray deployment (2009–2013), *Tectonophysics*, 663, 261–274, <https://doi.org/10.1016/j.tecto.2015.08.012>, 2015.
- Mignan, A. and Woessner, J.: Estimating the magnitude of completeness for earthquake catalogs, *Community Online Resource for Statistical Seismicity Analysis*, <https://doi.org/10.5078/CORSSA-00180805>, 2012.
- Mulder, T.: Geological Survey of Canada: Canadian National Seismic Network, *Summ. Bull. Internatl. Seismol. Cent.*, 48, 29–38, <https://doi.org/10.5281/ZENODO.998832>, 2015.
- Nettles, M. and Hjörleifsdóttir, V.: Earthquake source parameters for the 2010 January Haiti main shock and aftershock sequence, *Geophysical Journal International*, 183, 375–380, <https://doi.org/10.1111/j.1365-246x.2010.04732.x>, 2010.
- Ottmøller, L., Strømme, M. L., and Storheim, B. M.: Seismic Monitoring and Data Processing at the Norwegian National Seismic Network, *Summ. Bull. Internatl. Seismol. Cent.*, 52, 27–40, <https://doi.org/10.31905/1M97CSYL>, 2018.
- Patton, H. J.: Bias in the centroid moment tensor for central Asian earthquakes: Evidence from regional surface wave data, *Journal of Geophysical Research: Solid Earth*, 103, 26 963–26 974, <https://doi.org/10.1029/98jb02529>, 1998.
- Patton, H. J. and Randall, G. E.: On the causes of biased estimates of seismic moment for earthquakes in central Asia, *Journal of Geophysical Research: Solid Earth*, 107, 2302, <https://doi.org/10.1029/2001jb000351>, 2002.
- Pérez-Campos, X., Espíndola, V. H., Pérez, J., Estrada, J. A., Cárdenas Monroy, C., Zanolli, B. F., Bello, D., González-López, A., González Ávila, D., Maldonado, R., Montoya-Quintanar, E., Vite, R., Martínez, L. D., Tan, Y., Rodríguez Rasilla, I., Vela Rosas, M. Á., Cruz, J. L., Cárdenas, A., Navarro Estrada, F., Hurtado, A., and Mendoza Carvajal, A. D. J.: Servicio Sismológico Nacional, Mexico, *Summ. Bull. Internatl. Seismol. Cent.*, 53, 29–40, <https://doi.org/10.31905/sz7rybtm>, 2019.
- Polet, J. and Thio, H. K.: Rapid calculation of a Centroid Moment Tensor and waveheight predictions around the north Pacific for the 2011 off the Pacific coast of Tohoku Earthquake, *Earth, Planets and Space*, 63, 541–545, <https://doi.org/10.5047/eps.2011.05.005>, 2011.
- Pondrelli, S.: European-Mediterranean Regional Centroid-Moment Tensors Catalog (RCMT) [Data Set], Istituto Nazionale di Geofisica e Vulcanologia (INGV), <https://doi.org/10.13127/RCMT/EUROMED>, 2002.
- Sánchez, G., Recio, R., Marcuzzi, O., Moreno, M., Araujo, M., Navarro, C., Suárez, J. C., Havskov, J., and Ottmøller, L.: The Argentinean National Network of Seismic and Strong-Motion Stations, *Seismological Research Letters*, 84, 729–736, <https://doi.org/10.1785/0220120045>, 2013.
- Scognamiglio, L., Tinti, E., and Quintiliani, M.: Time Domain Moment Tensor [Data set], Istituto Nazionale di Geofisica e Vulcanologia (INGV), <https://doi.org/10.13127/TDMT>, 2006.
- Scordilis, E. M.: Empirical Global Relations Converting MS and mb to Moment Magnitude, *Journal of Seismology*, 10, 225–236, <https://doi.org/10.1007/s10950-006-9012-4>, 2006.
- Stich, D., Ammon, C. J., and Morales, J.: Moment tensor solutions for small and moderate earthquakes in the Ibero-Maghreb region, *Journal of Geophysical Research: Solid Earth*, 108, <https://doi.org/10.1029/2002jb002057>, 2003.
- Stich, D., Serpelloni, E., de Lis Mancilla, F., and Morales, J.: Kinematics of the Iberia–Maghreb plate contact from seismic moment tensors and GPS observations, *Tectonophysics*, 426, 295–317, <https://doi.org/10.1016/j.tecto.2006.08.004>, 2006.
- Stich, D., Martín, R., and Morales, J.: Moment tensor inversion for Iberia–Maghreb earthquakes 2005–2008, *Tectonophysics*, 483, 390–398, <https://doi.org/10.1016/j.tecto.2009.11.006>, 2010.
- Storchak, D. A., Harris, J., Brown, L., Lieser, K., Shumba, B., Verney, R., Di Giacomo, D., and Korger, E. I. M.: Rebuild of the Bulletin of the International Seismological Centre (ISC), part 1: 1964–1979, *Geoscience Letters*, 4:32, <https://doi.org/10.1186/s40562-017-0098-z>, 2017.

- 575 Storchak, D. A., Harris, J., Brown, L., Lieser, K., Shumba, B., and Di Giacomo, D.: Rebuild of the Bulletin of the International Seismological  
Centre (ISC) - part 2: 1980–2010, *Geoscience Letters*, 7:18, <https://doi.org/10.1186/s40562-020-00164-6>, 2020.
- Tsuboi, S.: Application of Mw to tsunami earthquake, *Geophysical Research Letters*, 27, 3105–3108, <https://doi.org/10.1029/2000gl011735>,  
2000.
- Tsuboi, S., Abe, K., Takano, K., and Yamanaka, Y.: Rapid determination of Mw from broadband P waveforms, *Bulletin of the Seismological*  
580 *Society of America*, 85, 606–613, 1995.
- Tsuboi, S., Whitmore, P. M., and Sokolowski, T. J.: Application of Mw to deep and teleseismic earthquakes, *Bulletin of the Seismological*  
*Society of America*, 89, 1345–1351, 1999.
- Vallée, M.: Source time function properties indicate a strain drop independent of earthquake depth and magnitude, *Nature Communications*,  
4, <https://doi.org/10.1038/ncomms3606>, 2013.
- 585 Vallée, M., Charléty, J., Ferreira, A. M. G., Delouis, B., and Vergoz, J.: SCARDEC: a new technique for the rapid determination of seismic  
moment magnitude, focal mechanism and source time functions for large earthquakes using body-wave deconvolution, *Geophysical*  
*Journal International*, 184, 338–358, <https://doi.org/10.1111/j.1365-246x.2010.04836.x>, 2010.
- Wessel, P., Smith, W. H. F., Scharroo, R., Luis, J., and Wobbe, F.: Generic Mapping Tools: Improved Version Released, *Eos, Transactions*  
*American Geophysical Union*, 94, 409–410, <https://doi.org/10.1002/2013eo450001>, 2013.
- 590 Whitmore, P. M., Tsuboi, S., Hirshorn, B., and Sokolowski, T. J.: Magnitude-dependent correction for Mw, *Science of Tsunami Hazards*,  
20, 187–192, 2002.
- Wiemer, S. and Wyss, M.: Minimum Magnitude of Completeness in Earthquake Catalogs: Examples from Alaska, the Western United States,  
and Japan, *Bulletin of the Seismological Society of America*, 90, 859–869, <https://doi.org/10.1785/0119990114>, 2000.
- Yoder, M. R., Holliday, J. R., Turcotte, D. L., and Rundle, J. B.: A geometric frequency–magnitude scaling transition: Measuring  $b=1.5$  for  
595 large earthquakes, *Tectonophysics*, 532–535, 167–174, <https://doi.org/10.1016/j.tecto.2012.01.034>, 2012.

**Table 1.** Details of the agencies contributing with  $M_w$  to the ISC Bulletin. Country refers to where the agency is based. The column  $M_w$  procedure is to characterize agencies using waveform inversion techniques to obtain moment tensors (Lentas et al., 2019) or spectral fitting techniques (Havskov and Ottemöller, 1999; Havskov et al., 2020) to obtain  $M_0$ . For several agencies to procedure is not known to us. The "X" symbol in the last column (Analysed) is to identify agencies that will be discussed in the magnitude comparison sections. Full agency details can be found by typing the agency code at [www.isc.ac.uk/iscbulletin/agencies/](http://www.isc.ac.uk/iscbulletin/agencies/).

| Agency code | Name [Institute, Country]                                                                                        | Mw procedure       | Analysed |
|-------------|------------------------------------------------------------------------------------------------------------------|--------------------|----------|
| AFAD        | Disaster and Emergency Management Presidency [Turkey]                                                            | Spectral analysis  |          |
| AFAR        | The Afar Depression: Interpretation of the 1960-2000 Earthquakes [Geophysical Institute of Israel]               | Waveform inversion |          |
| ASIES       | Institute of Earth Sciences, Academia Sinica [Chinese Taipei]                                                    | Waveform inversion | X        |
| ATA         | The Earthquake Research Center Ataturk University [Deprem Arastirma Merkezi, Ataturk Universitesi, Turkey]       |                    |          |
| ATH         | National Observatory of Athens [Institute of Geodynamics, Greece]                                                | Waveform inversion |          |
| BER         | University of Bergen [Department of Earth Science, Norway]                                                       |                    |          |
| BRK         | Berkeley Seismological Laboratory [University of California, U.S.A.]                                             | Waveform inversion | X        |
| BUD         | Geodetic and Geophysical Research Institute [Hungarian Academy of Sciences, Hungary]                             |                    |          |
| CASC        | Central American Seismic Center [Escuela Centroamericano de Geologia, Universidad de Costa Rica, Costa Rica]     | Spectral analysis  |          |
| CATAC       | Central American Tsunami Advisory Center [Nicaragua]                                                             |                    | X        |
| CRAAG       | Centre de Recherche en Astronomie, Astrophysique et Géophysique [Algeria]                                        |                    |          |
| DDA         | General Directorate of Disaster Affairs [Turkey]                                                                 |                    |          |
| DJA         | Badan Meteorologi, Klimatologi dan Geofisika [Indonesia]                                                         |                    | X        |
| DNK         | Geological Survey of Denmark and Greenland [Denmark]                                                             |                    |          |
| ECX         | Centro de Investigación Científica y de Educación Superior de Ensenada [Mexico]                                  | Spectral analysis  |          |
| FUNV        | Fundación Venezolana de Investigaciones Sismológicas [Venezuela]                                                 | Spectral analysis  | X        |
| GCMT        | The Global CMT Project [Lamont Doherty Earth Observatory, Columbia University, U.S.A.]                           | Waveform inversion | X        |
| GEOMR       | GEOMAR [Helmholtz Centre for Ocean Reserch Kiel, Germany]                                                        | Spectral analysis  |          |
| GII         | The Geophysical Institute of Israel [Geophysical Institute of Israel]                                            |                    |          |
| GUC         | Centro Sismológico Nacional, Universidad de Chile [Santiago, Chile]                                              |                    | X        |
| HIMNT       | Himalayan Nepal Tibet Experiment [University of Colorado at Boulder, U.S.A.]                                     | Waveform inversion |          |
| HLW         | National Research Institute of Astronomy and Geophysics [Egypt]                                                  |                    |          |
| IAG         | Instituto Andaluz de Geofísica [Universidad de Granada, Spain]                                                   | Waveform inversion |          |
| IEC         | Institute of the Earth Crust, SB RAS [Siberian Branch of the RAS, Russia]                                        |                    |          |
| IGIL        | Instituto Dom Luiz, University of Lisbon [Faculdade de Ciências da Universidade de Lisboa, Portugal]             |                    |          |
| INET        | Instituto Nicaraguense de Estudios Territoriales - INETER [Nicaragua]                                            |                    | X        |
| INMG        | Instituto Português do Mar e da Atmosfera [Portugal]                                                             |                    |          |
| IPGP        | Institut de Physique du Globe de Paris [France]                                                                  | Waveform inversion | X        |
| IPRG        | Institute for Petroleum Research and Geophysics [Israel]                                                         |                    |          |
| JMA         | Japan Meteorological Agency [Japan]                                                                              | Waveform inversion |          |
| JSN         | Jamaica Seismic Network [The University of the West Indies, Department of Geology, Jamaica]                      |                    |          |
| LIB         | Tripoli [Seismological Observatory Office, Libya]                                                                |                    |          |
| MDD         | Instituto Geográfico Nacional [Red Sísmica Nacional, Spain]                                                      |                    |          |
| MED_RCMT    | MedNet Regional Centroid - Moment Tensors [Istituto Nazionale di Geofisica e Vulcanologia, Bologna, Italy]       | Waveform inversion | X        |
| MEX         | Instituto de Geofísica de la UNAM [Mexico]                                                                       |                    |          |
| MOS         | Geophysical Survey of Russian Academy of Sciences [Russia]                                                       |                    |          |
| NCEDC       | Northern California Earthquake Data Center [University of California, Berkeley and US Geological Survey, U.S.A.] | Waveform inversion | X        |
| NDI         | National Centre for Seismology of the Ministry of Earth Sciences of India [India]                                |                    |          |
| NEIC        | National Earthquake Information Center [U.S. Geological Survey, U.S.A.]                                          | Waveform inversion | X        |

**Table 2.** [Table 1](#), continued.

| <a href="#">Agency code</a> | <a href="#">Name [Institute, Country]</a>                                                                                     | <a href="#">Mw procedure</a>       | <a href="#">Analysed</a> |
|-----------------------------|-------------------------------------------------------------------------------------------------------------------------------|------------------------------------|--------------------------|
| <a href="#">NIC</a>         | <a href="#">Cyprus Geological Survey Department [Cyprus]</a>                                                                  |                                    |                          |
| <a href="#">NIED</a>        | <a href="#">National Research Institute for Earth Science and Disaster Prevention [Japan]</a>                                 | <a href="#">Waveform inversion</a> | <a href="#">X</a>        |
| <a href="#">OGAUC</a>       | <a href="#">Centro de Investigação da Terra e do Espaço da Universidade de Coimbra [Portugal]</a>                             | <a href="#">Waveform inversion</a> |                          |
| <a href="#">OTT</a>         | <a href="#">Canadian Hazards Information Service, Natural Resources Canada [Canada]</a>                                       | <a href="#">Waveform inversion</a> | <a href="#">X</a>        |
| <a href="#">PAS</a>         | <a href="#">California Institute of Technology [Seismological Laboratory, U.S.A.]</a>                                         | <a href="#">Waveform inversion</a> | <a href="#">X</a>        |
| <a href="#">PGC</a>         | <a href="#">Pacific Geoscience Centre [Canada]</a>                                                                            | <a href="#">Waveform inversion</a> | <a href="#">X</a>        |
| <a href="#">PRE</a>         | <a href="#">Council for Geoscience [South Africa]</a>                                                                         |                                    |                          |
| <a href="#">REN</a>         | <a href="#">MacKay School of Mines [University of Nevada, U.S.A.]</a>                                                         |                                    |                          |
| <a href="#">ROM</a>         | <a href="#">Istituto Nazionale di Geofisica e Vulcanologia [Rome, Italy]</a>                                                  | <a href="#">Waveform inversion</a> |                          |
| <a href="#">RSNC</a>        | <a href="#">Red Sismológica Nacional de Colombia [Servicio Geológico Colombiano, Colombia]</a>                                |                                    | <a href="#">X</a>        |
| <a href="#">SCB</a>         | <a href="#">Observatorio San Calixto [Bolivia]</a>                                                                            |                                    |                          |
| <a href="#">SDD</a>         | <a href="#">Universidad Autonoma de Santo Domingo [Facultad de ciencias, Dominican Republic]</a>                              |                                    |                          |
| <a href="#">SJA</a>         | <a href="#">Instituto Nacional de Prevención Sísmica [Argentina]</a>                                                          | <a href="#">Spectral analysis</a>  | <a href="#">X</a>        |
| <a href="#">SLM</a>         | <a href="#">Saint Louis University [Department of Earth and Atmospheric Sciences, U.S.A.]</a>                                 | <a href="#">Waveform inversion</a> | <a href="#">X</a>        |
| <a href="#">SNET</a>        | <a href="#">Servicio Nacional de Estudios Territoriales [Ministerio de Obras Publicas de El Salvador]</a>                     |                                    |                          |
| <a href="#">SSNC</a>        | <a href="#">Servicio Sismológico Nacional Cubano [Cuba]</a>                                                                   |                                    |                          |
| <a href="#">SSS</a>         | <a href="#">Centro de Estudios y Investigaciones Geotecnicas del San Salvador [El Salvador]</a>                               |                                    |                          |
| <a href="#">UAF</a>         | <a href="#">Department of Geosciences [University of Alaska, Fairbanks, U.S.A.]</a>                                           | <a href="#">Waveform inversion</a> |                          |
| <a href="#">UCDES</a>       | <a href="#">Department of Earth Sciences [University of Cambridge, United Kingdom]</a>                                        | <a href="#">Waveform inversion</a> |                          |
| <a href="#">UCR</a>         | <a href="#">Sección de Sismología, Vulcanología y Exploración Geofísica [Escuela Centroamericana de Geología, Costa Rica]</a> |                                    | <a href="#">X</a>        |
| <a href="#">UPA</a>         | <a href="#">Universidad de Panama [Instituto de Geociencias, Universidad de Panama, Panama]</a>                               |                                    | <a href="#">X</a>        |
| <a href="#">UPIES</a>       | <a href="#">Institute of Earth- and Environmental Science [University of Potsdam, Germany]</a>                                | <a href="#">Waveform inversion</a> |                          |
| <a href="#">UPSL</a>        | <a href="#">University of Patras, Department of Geology [Greece]</a>                                                          |                                    |                          |
| <a href="#">WEL</a>         | <a href="#">Institute of Geological and Nuclear Sciences [GNS Science, New Zealand]</a>                                       | <a href="#">Waveform inversion</a> | <a href="#">X</a>        |
| <a href="#">ZUR_RMT</a>     | <a href="#">Zurich Moment Tensors [Swiss Seismological Service, Switzerland]</a>                                              | <a href="#">Waveform inversion</a> |                          |

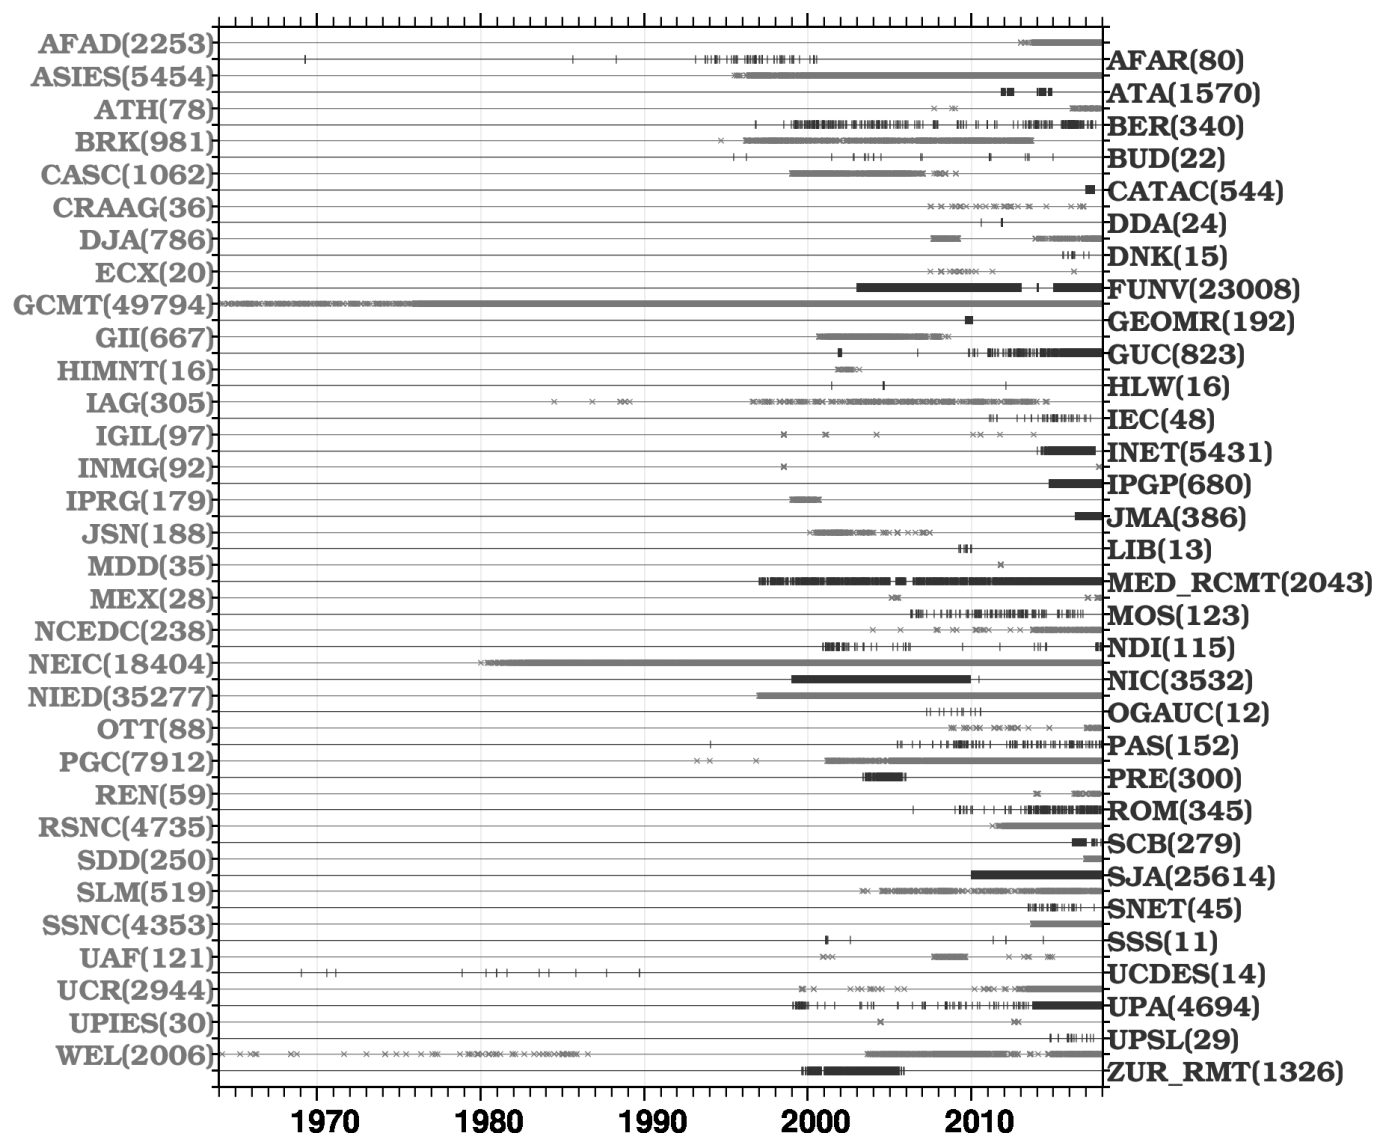

**Figure 1.** Timelines of the agencies contributing with  $M_w$  to the ISC Bulletin. Details about each agency code can be found by typing the agency code at [www.isc.ac.uk/iscbulletin//agencies/](http://www.isc.ac.uk/iscbulletin//agencies/). Each symbol represents the origin time of an earthquake and in brackets is the total number of  $M_w$  for an agency. For better visibility, grey and black text and symbols refer to the agencies listed on the left and on the right, respectively. Note that 25  $M_w$  authors with less than 10 entries have been skipped from the DH  $M_w$  List.

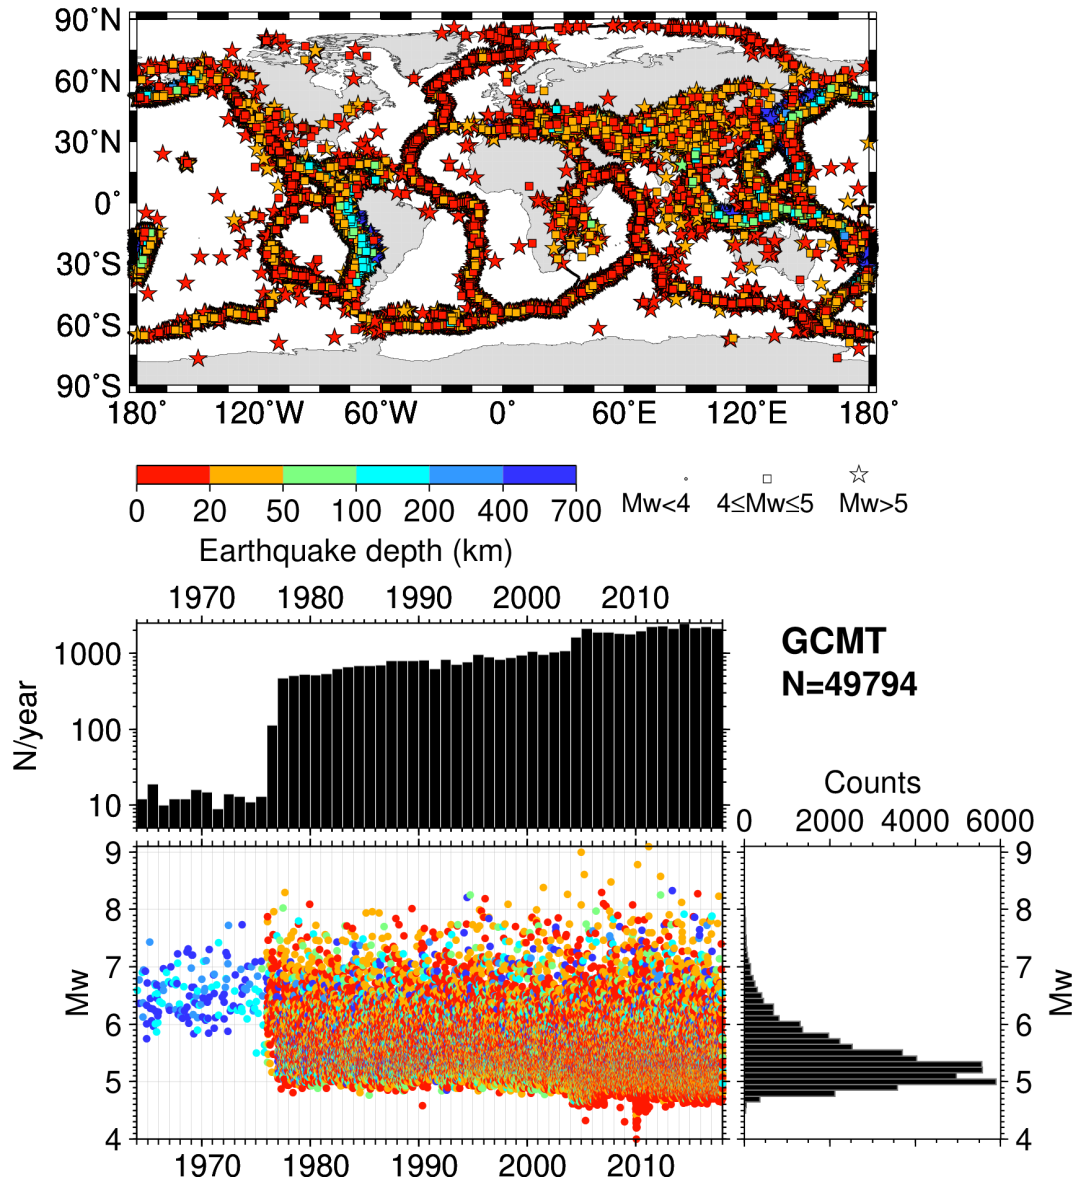

**Figure 2.** Map (top) showing the GCMT centroid location color-coded by depth. Stars are earthquakes with  $M_w$  greater than 5, squares between 4 and 5, small circles below 4. Although not visible here, the map also includes the Bird (2003) plate tectonic boundaries. The lower panel shows the  $M_w$  timeline with symbols color-coded by depth along with histograms on the right hand side and number of earthquakes per year on top of the timeline. Only results of special studies for deep (Huang et al., 1997) and intermediate-depth (Chen et al., 2001) earthquakes are available before 1976. The map was drawn using the Generic Mapping Tools (GMT) (Wessel et al., 2013) software.

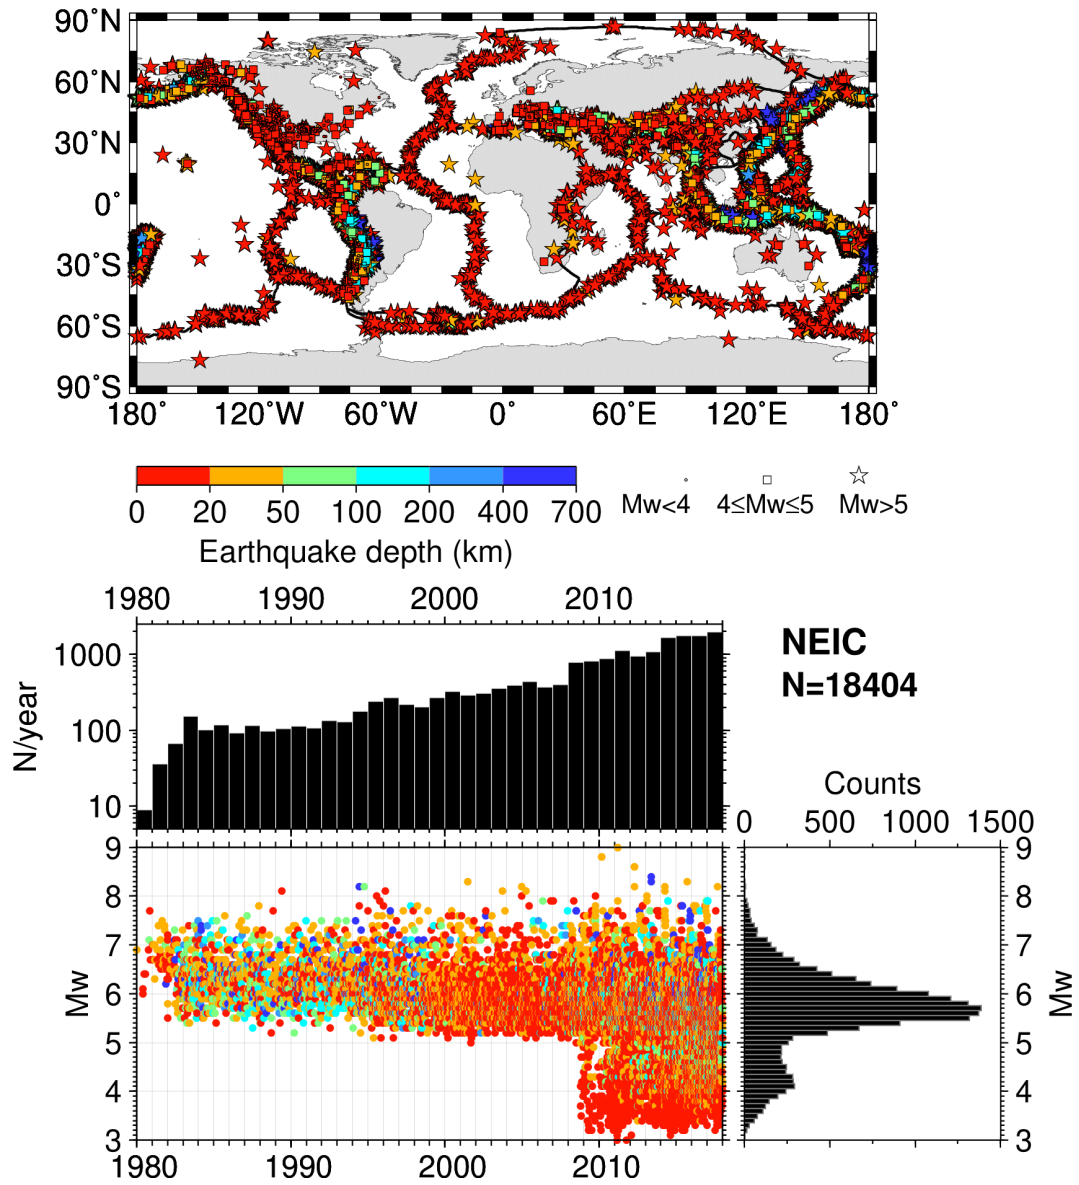

**Figure 3.** As for Fig. 2 but for agency/magnitude author = NEIC. Note that NEIC may compute more than one  $M_w$  per earthquake, hence the number of  $M_w$  reported in the Figure here refers to number of  $M_w$  entries (number of earthquakes = 14,337). See text for details. The map was drawn using the Generic Mapping Tools (GMT) (Wessel et al., 2013) software.



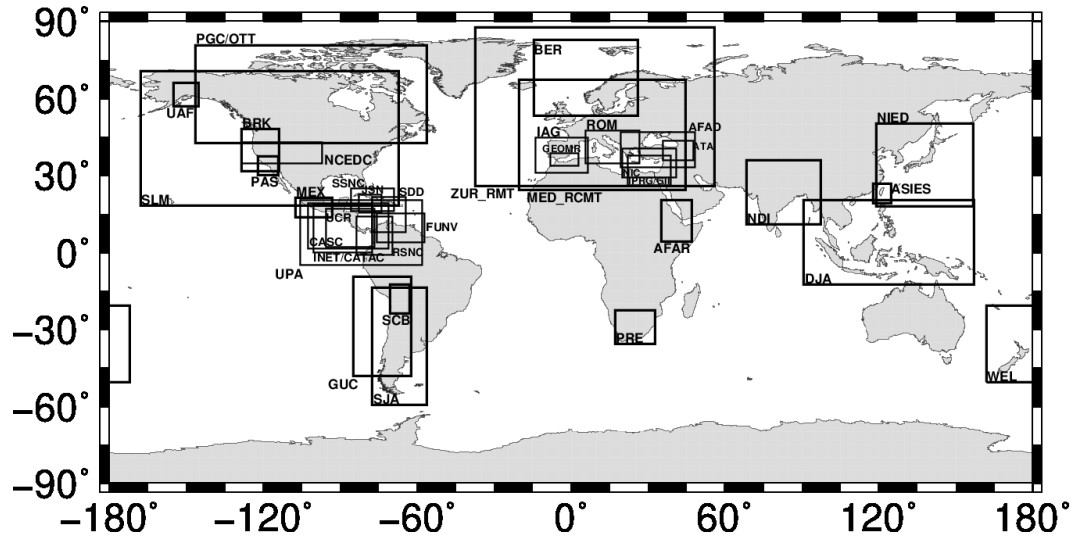

**Figure 4.** Overview of the agencies reporting  $M_w$  to the ISC at regional scale. For simplicity, only agencies with at least 100  $M_w$  entries are shown (including agencies not reporting, see Fig. 1). Furthermore, JMA is not shown here as it covers the same region of NIED but only starting from 2016. The bounding boxes are retrieved from the hypocentres included in the DH  $M_w$  List and are not meant as limits of the area monitored by an agency. The boxes are drawn to highlight the regions where  $M_w$  is available from one or more agencies and areas where  $M_w$  is available in the ISC Bulletin only from global agencies (e.g., vast parts of Asia, Australia and Africa). The map was drawn using the Generic Mapping Tools (GMT) (Wessel et al., 2013) software.

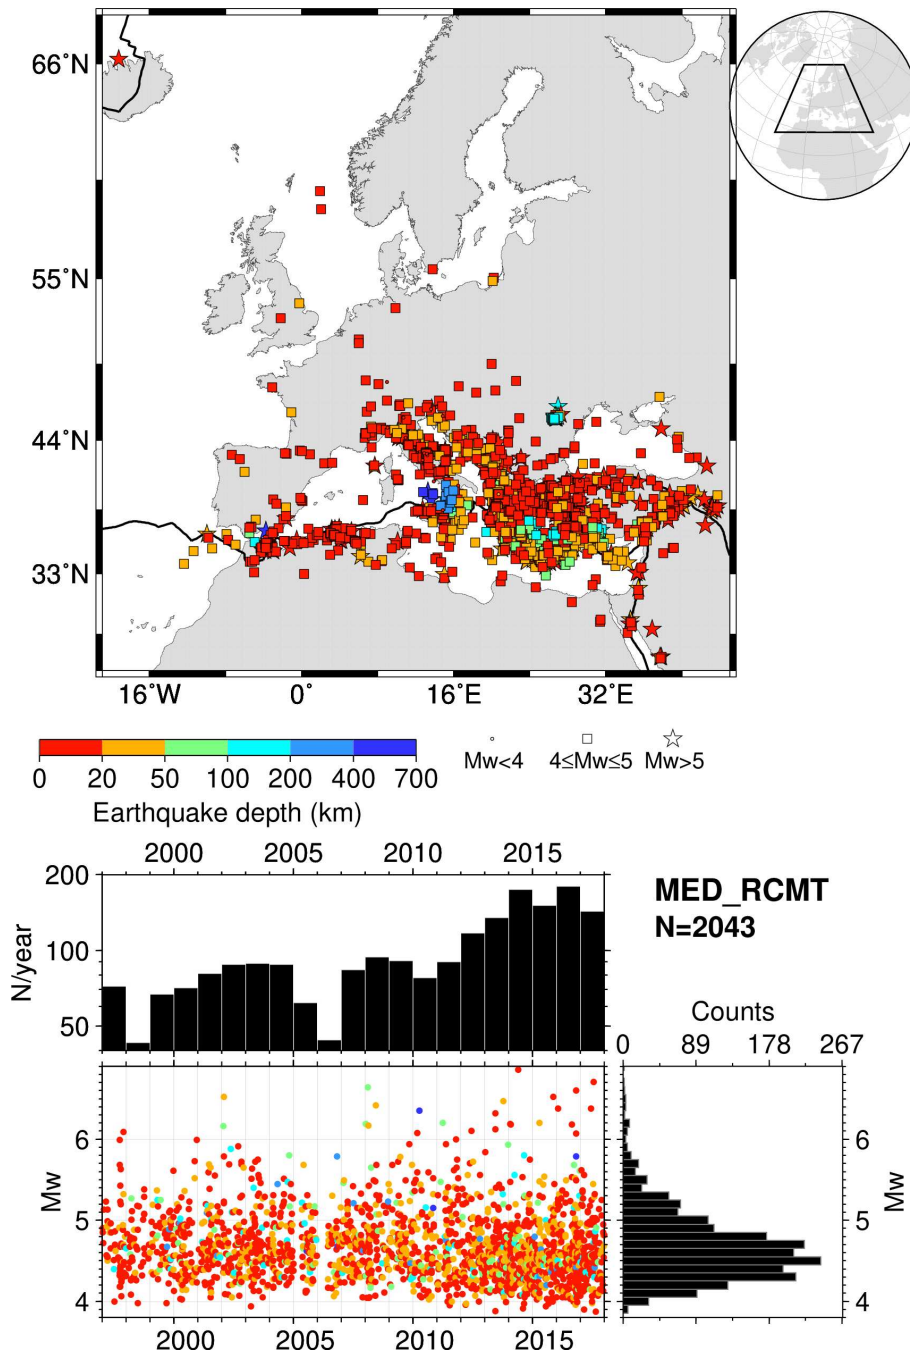

**Figure 5.** As for Fig. 2 but for agency/magnitude author = MED\_RCMT. The map was drawn using the Generic Mapping Tools (GMT) (Wessel et al., 2013) software.

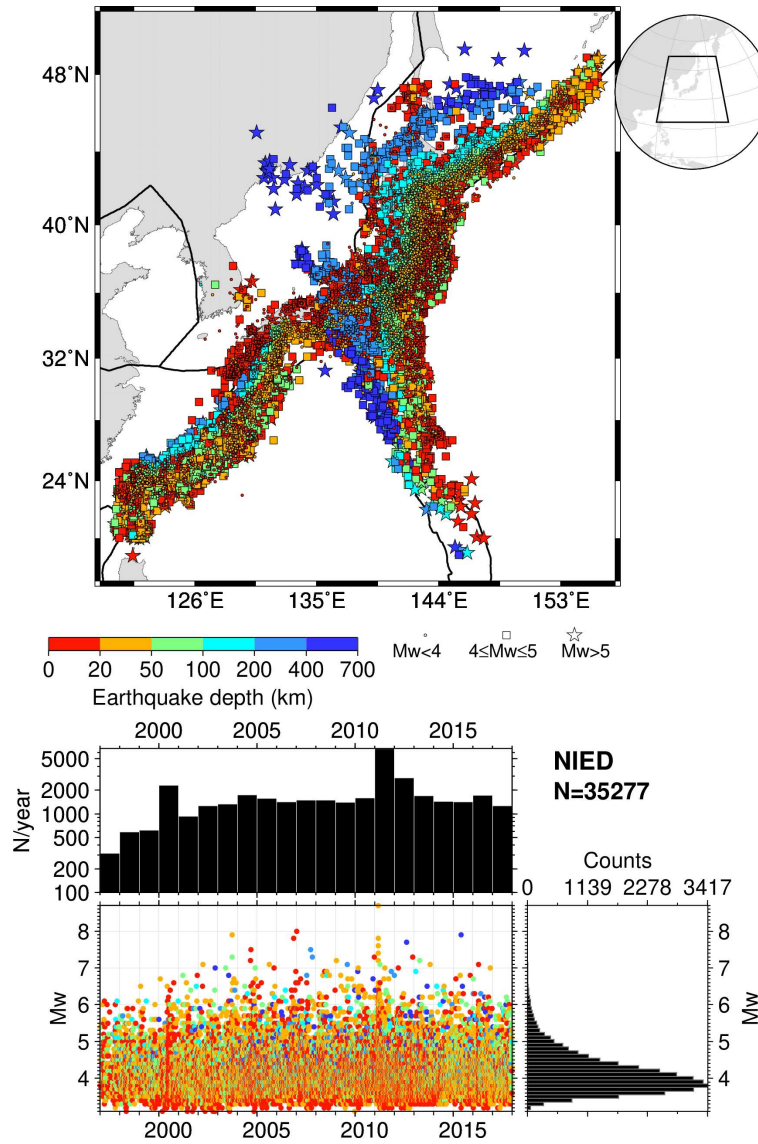

**Figure 6.** As for Fig. 2 but for agency/magnitude author = NIED. The map was drawn using the Generic Mapping Tools (GMT) (Wessel et al., 2013) software.

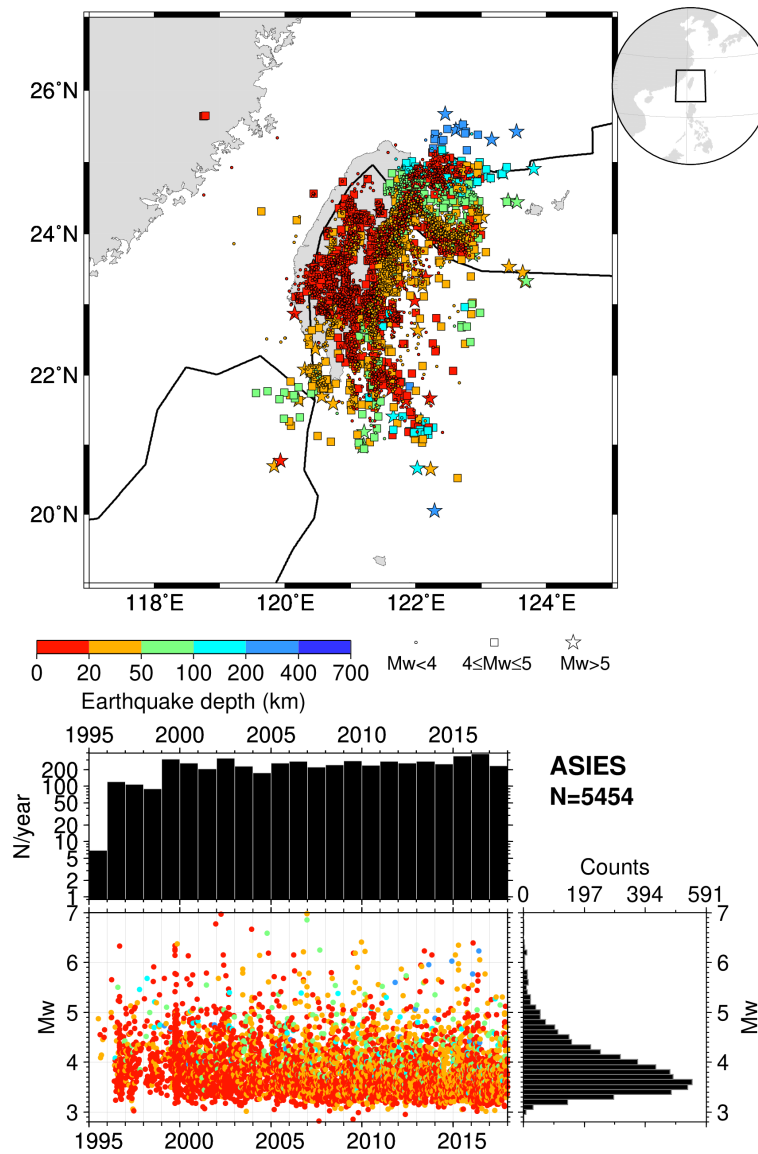

**Figure 7.** As for Fig. 2 but for agency/magnitude author = ASIES. The map was drawn using the Generic Mapping Tools (GMT) (Wessel et al., 2013) software.

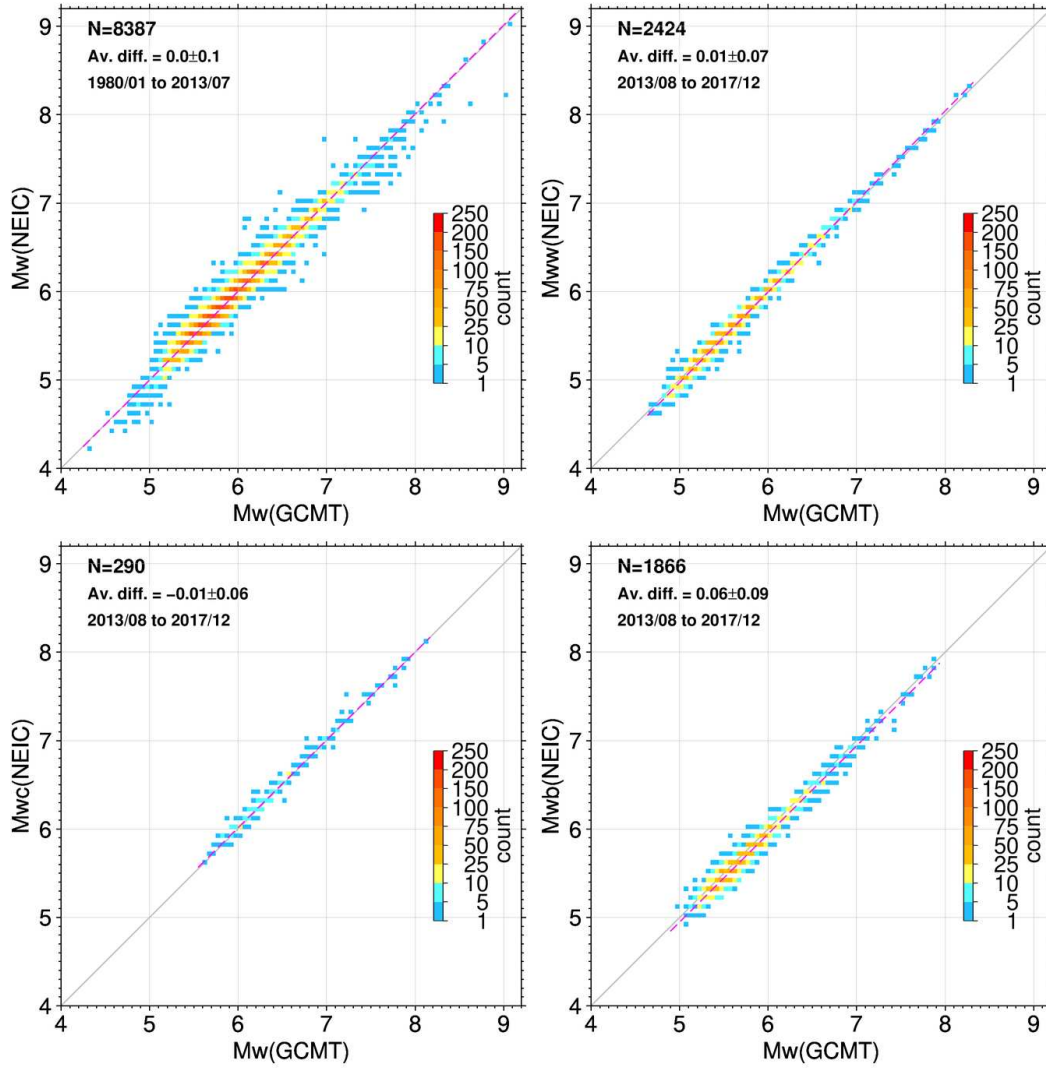

**Figure 8.** Comparison between  $M_w$  from GCMT and generic  $M_w$  NEIC for 1980-2013/07 (top left),  $M_{ww}$  (top right),  $M_{wc}$  (bottom left) and  $M_{wb}$  (bottom right) for the period August 2013 - December 2017. The comparison  $M_w$  GCMT with  $M_{wr}$  NEIC is shown in Section 3.3.6. The distributions are shown as colour-coded data frequency for  $0.1 \times 0.1$  m.u. cells. The magenta dashed line represents the orthogonal regression (e.g., Bormann et al., 2007; Lolli and Gasperini, 2012, and references therein). The total number of data points, average **difference** differences ( $M_w$  GCMT -  $M_w$  NEIC) and standard **deviation** deviations as well as period covered are reported in top left corner of each subplot. **The 1:1 lines are also shown (dashed grey lines).**

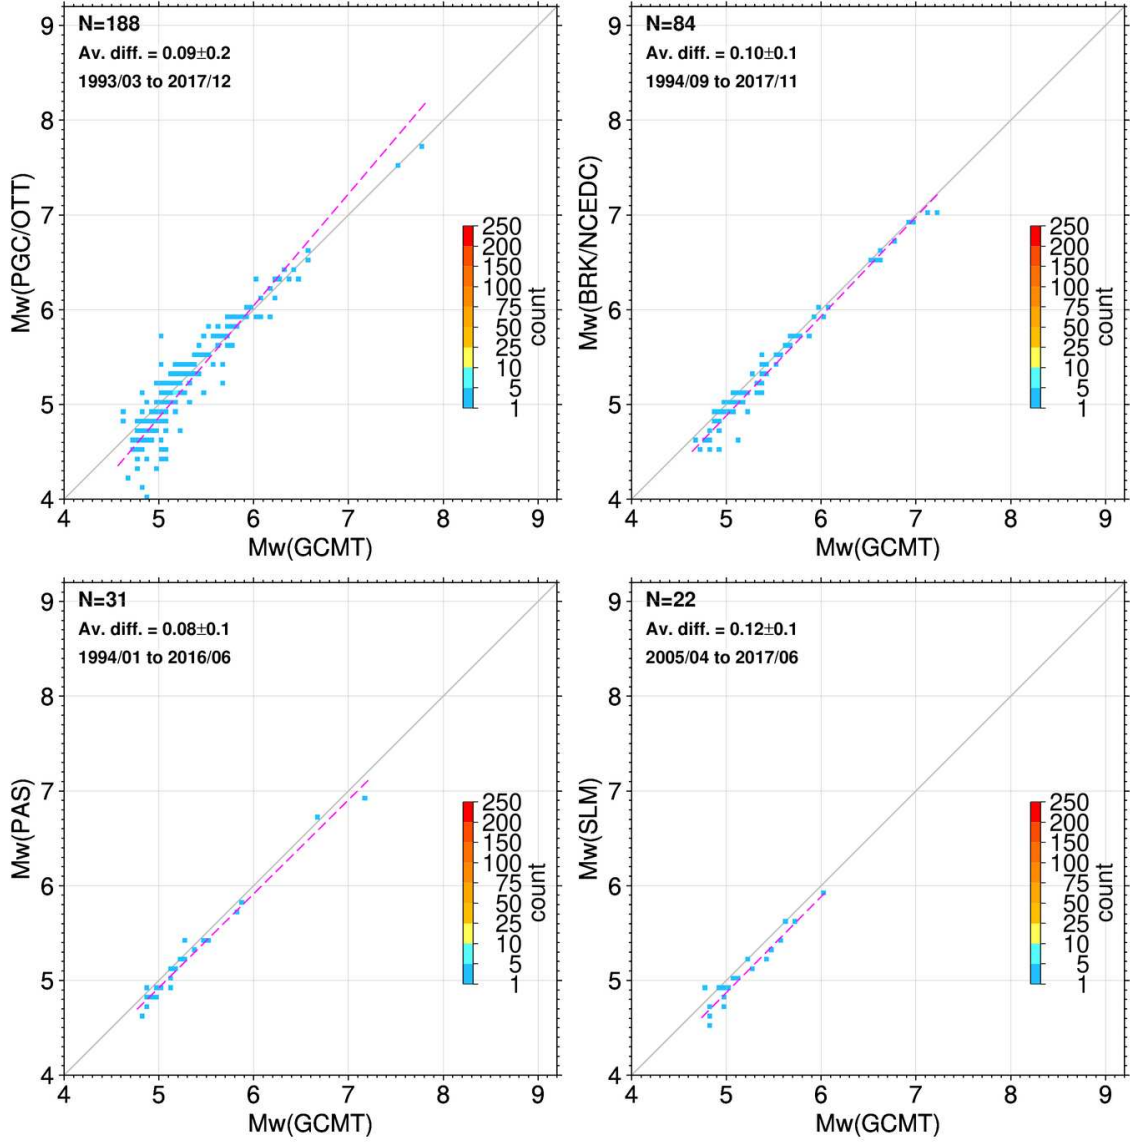

**Figure 9.** As for Fig. 8 but for GCMT and PGC/OTT (top left), GCMT and BRK/NCEDC (top right), GCMT and PAS (bottom left), GCMT and SLM (bottom right).

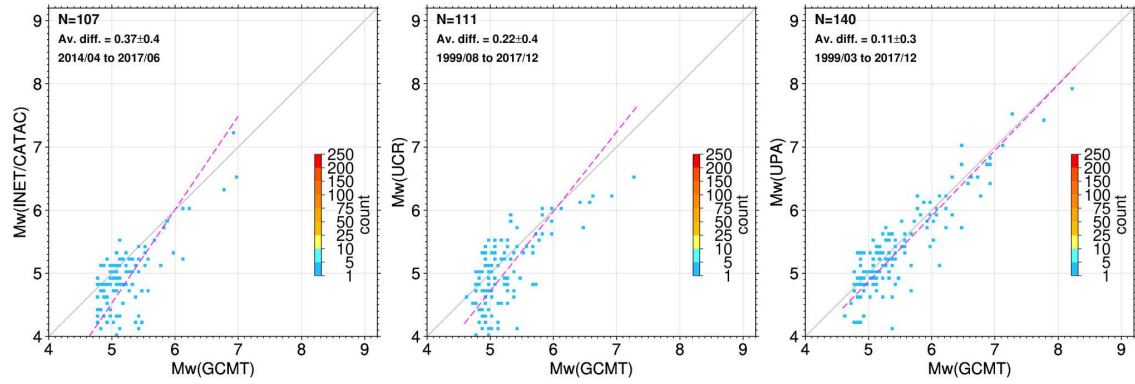

**Figure 10.** As for Fig. 8 but for GCMT and INET/CATAC (left), GCMT and UCR (middle), GCMT and UPA (right).

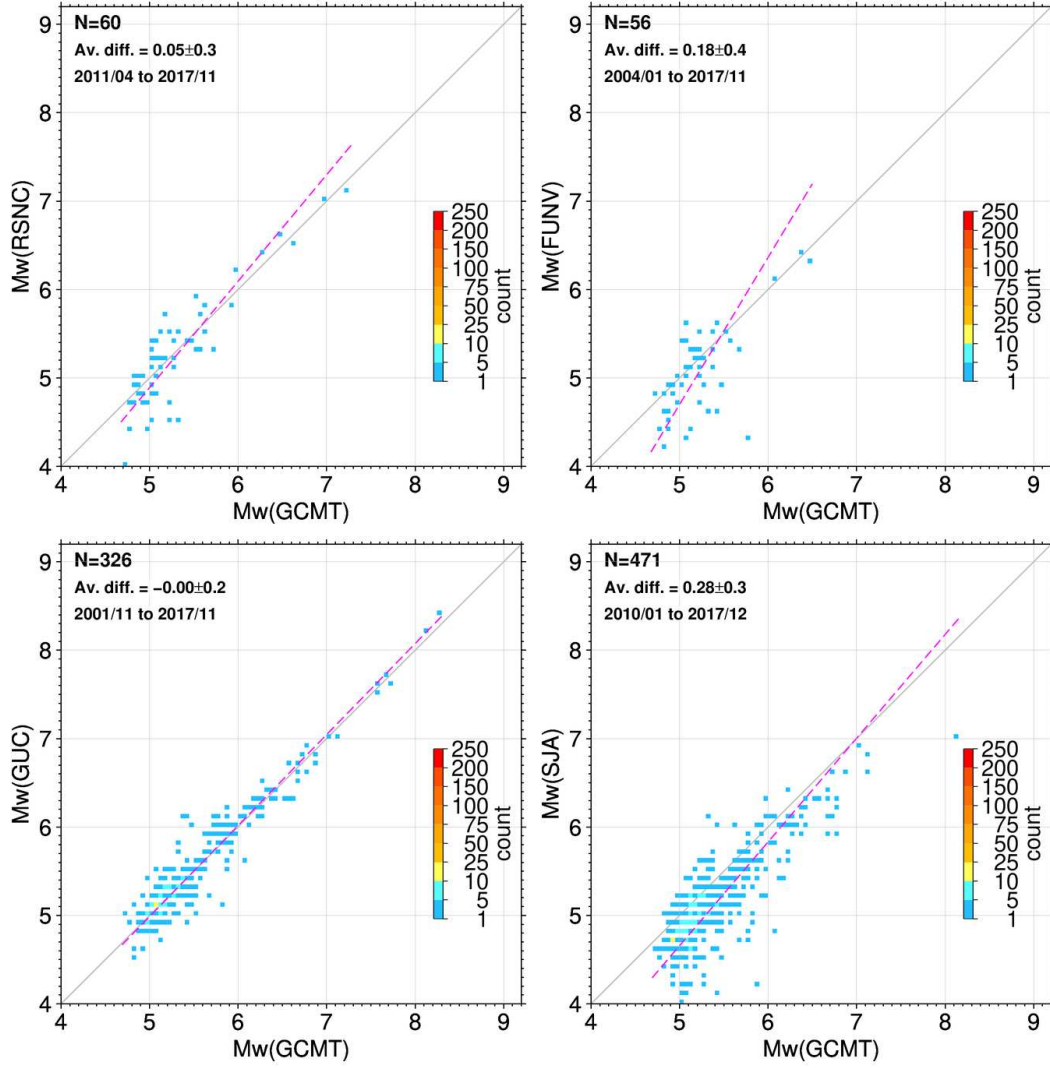

**Figure 11.** As for Fig. 8 but for GCMT and RSNC (top left), GCMT and FUNV (top right), GCMT and GUC (bottom left), GCMT and SJA (bottom right).



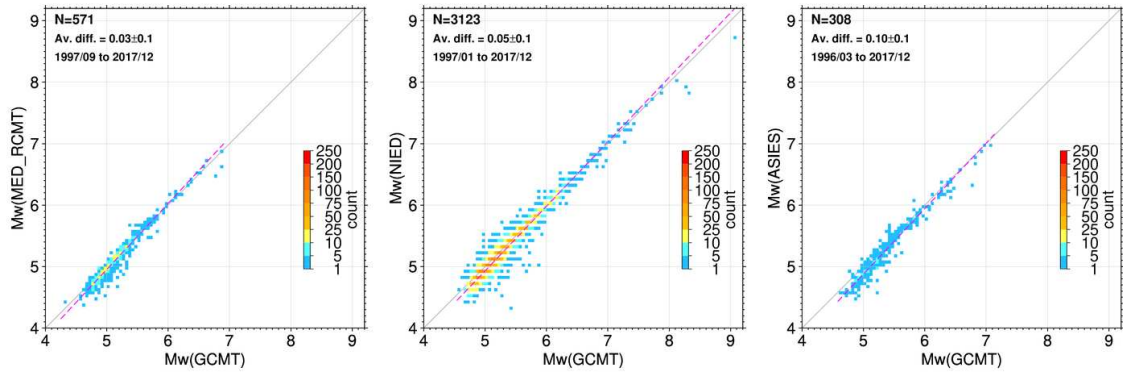

**Figure 12.** As for Fig. 8 but for GCMT and MED\_RCMT (left), GCMT and NIED (middle), GCMT and ASIES (right).

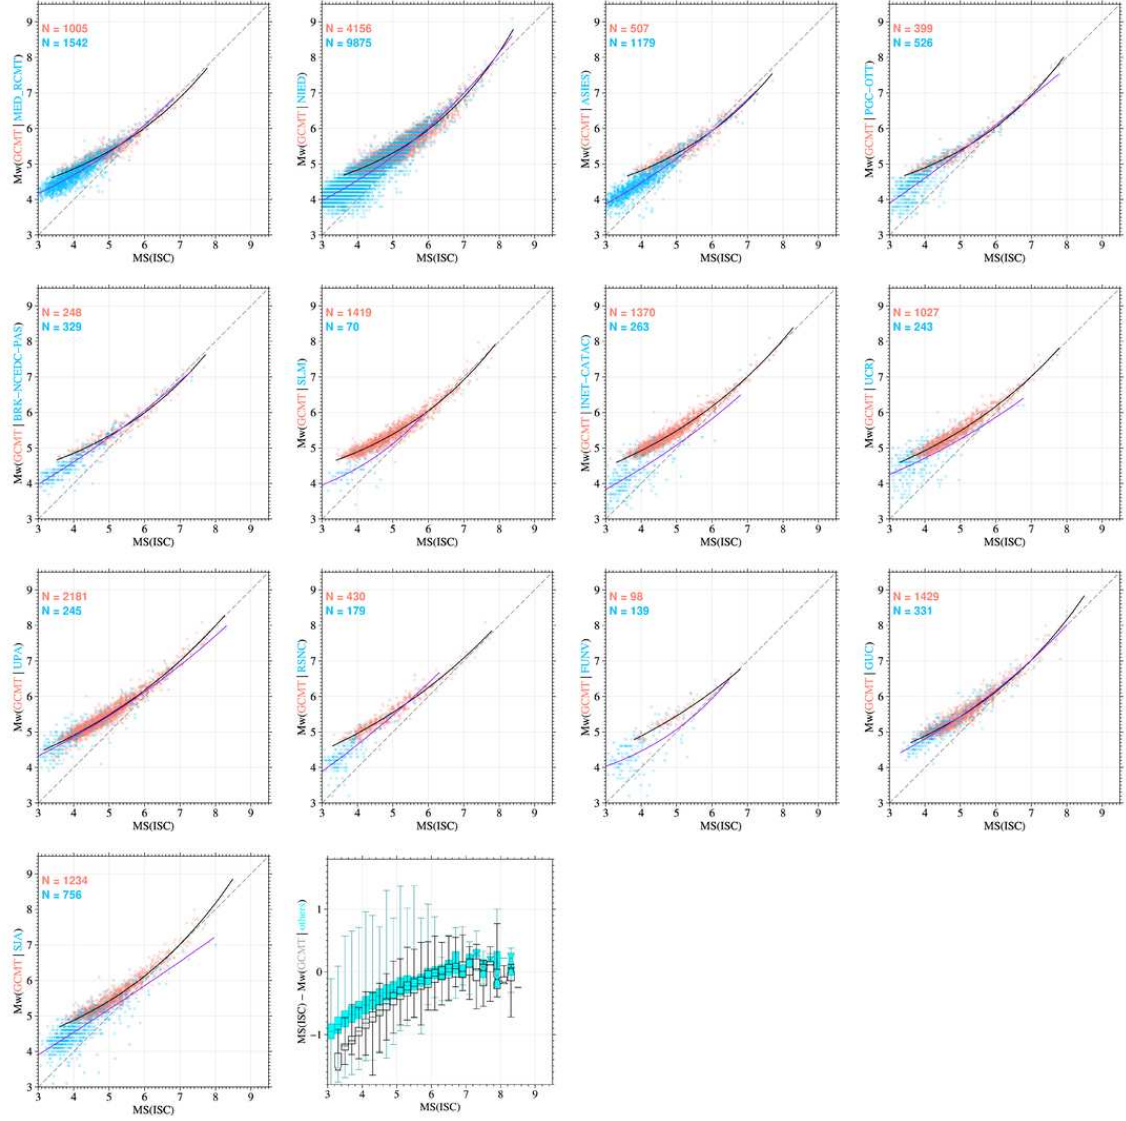

**Figure 13.** Comparisons between  $MS$  ISC and  $M_w$  GCMT (orange dots) for regional agencies (blue circles) consider in previous sections (the only difference here is that we grouped PAS with BRK/NCEDC). The nonlinear regressions between  $MS$  ISC and  $M_w$  GCMT (black solid curves) and between  $MS$  ISC with the regional agencies (purple solid curves) are also shown along with the 1:1 lines (dashed dark grey). The second subplot from the left at the bottom shows the box-and-whisker plot for 0.2  $MS$  ISC bins of the difference between  $MS$  ISC and  $M_w$  GCMT (black, transparent) and  $M_w$  from all other agencies (cyan). The box represents the 25%–75% quantile, the band inside the box represents the median and the ends of the whiskers represent the minimum and maximum of all data.

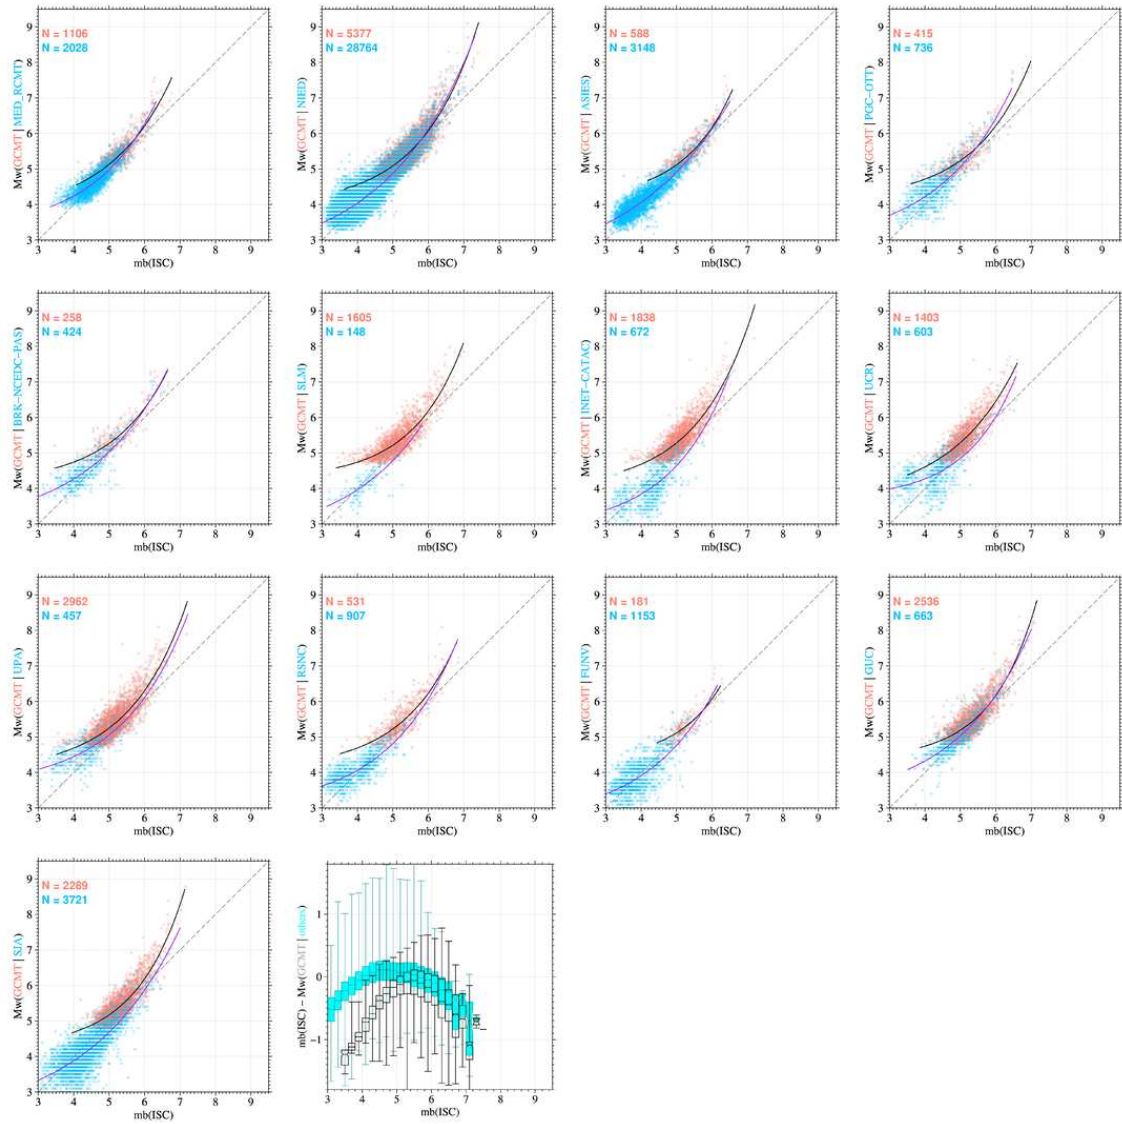

**Figure 14.** As for Fig. 13 but for  $m_b$  ISC.

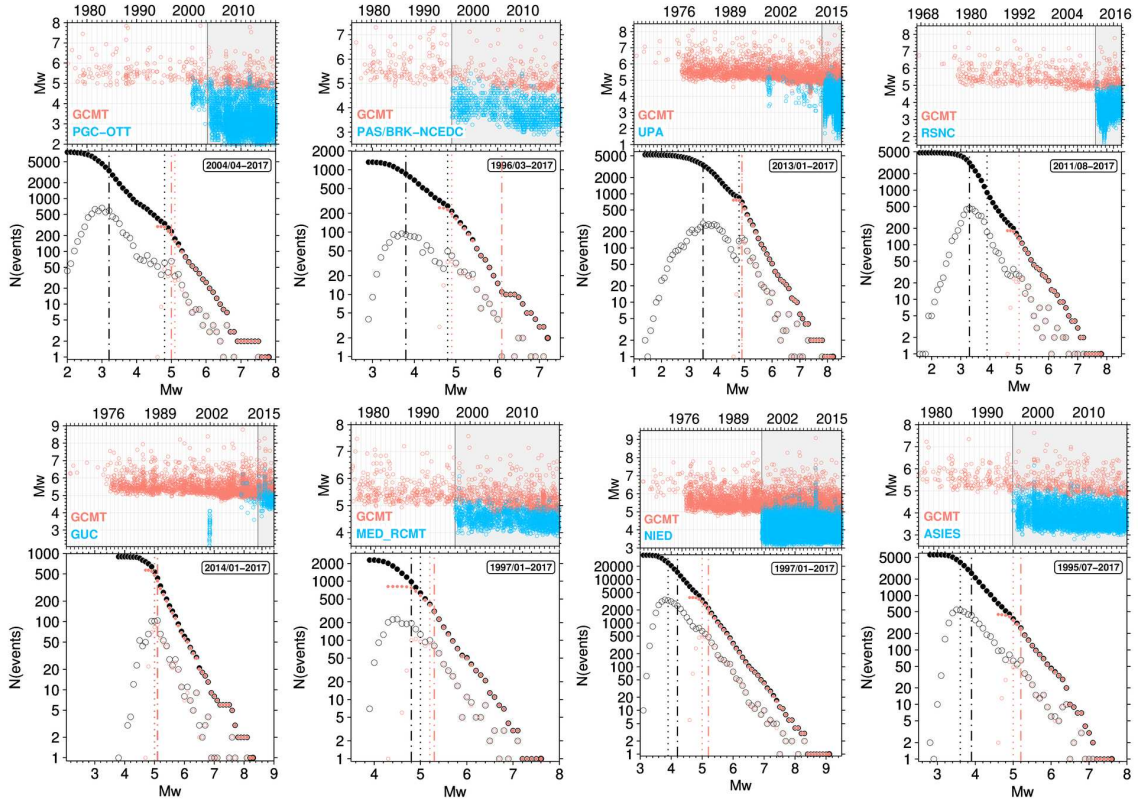

**Figure 15.** Magnitude timelines and frequency-magnitude distributions (FMD) for GCMT only (orange symbols) and GCMT complemented by some regional agency discussed above (blue in the timelines and black in the FMDs, with agency name reported in each subplot). The date range in the FMD panels (coinciding with the shaded grey areas in the timeline panels) in every subplot identifies the time period over which the FMD have been obtained both for GCMT alone and by complementing it with the corresponding regional agency. The filled and empty circles are cumulative and single frequencies, respectively. The dashed-dotted vertical lines (orange for GCMT only, black for GCMT and regional agency) depict the magnitude of completeness ( $M_c$ ) obtained with the median-based analysis of the segment slope by Amorese (2007), whereas the dotted vertical lines depict the  $M_c$  as obtained from the goodness-of-fit test by Wiemer and Wyss (2000). Note that  $M_c$  values for Chile (as covered by agency GUC) are identical for GCMT and GCMT + GUC, as from the timeline the GUC contribution started only in recent years. All the  $M_c$  values shown here have been obtained by using the rseismNet R package by A. Mignan, available at <https://github.com/amignan/rseismNet>, last accessed in September 2020. Details about the  $M_c$  estimation methods can be found in Mignan and Woessner (2012).

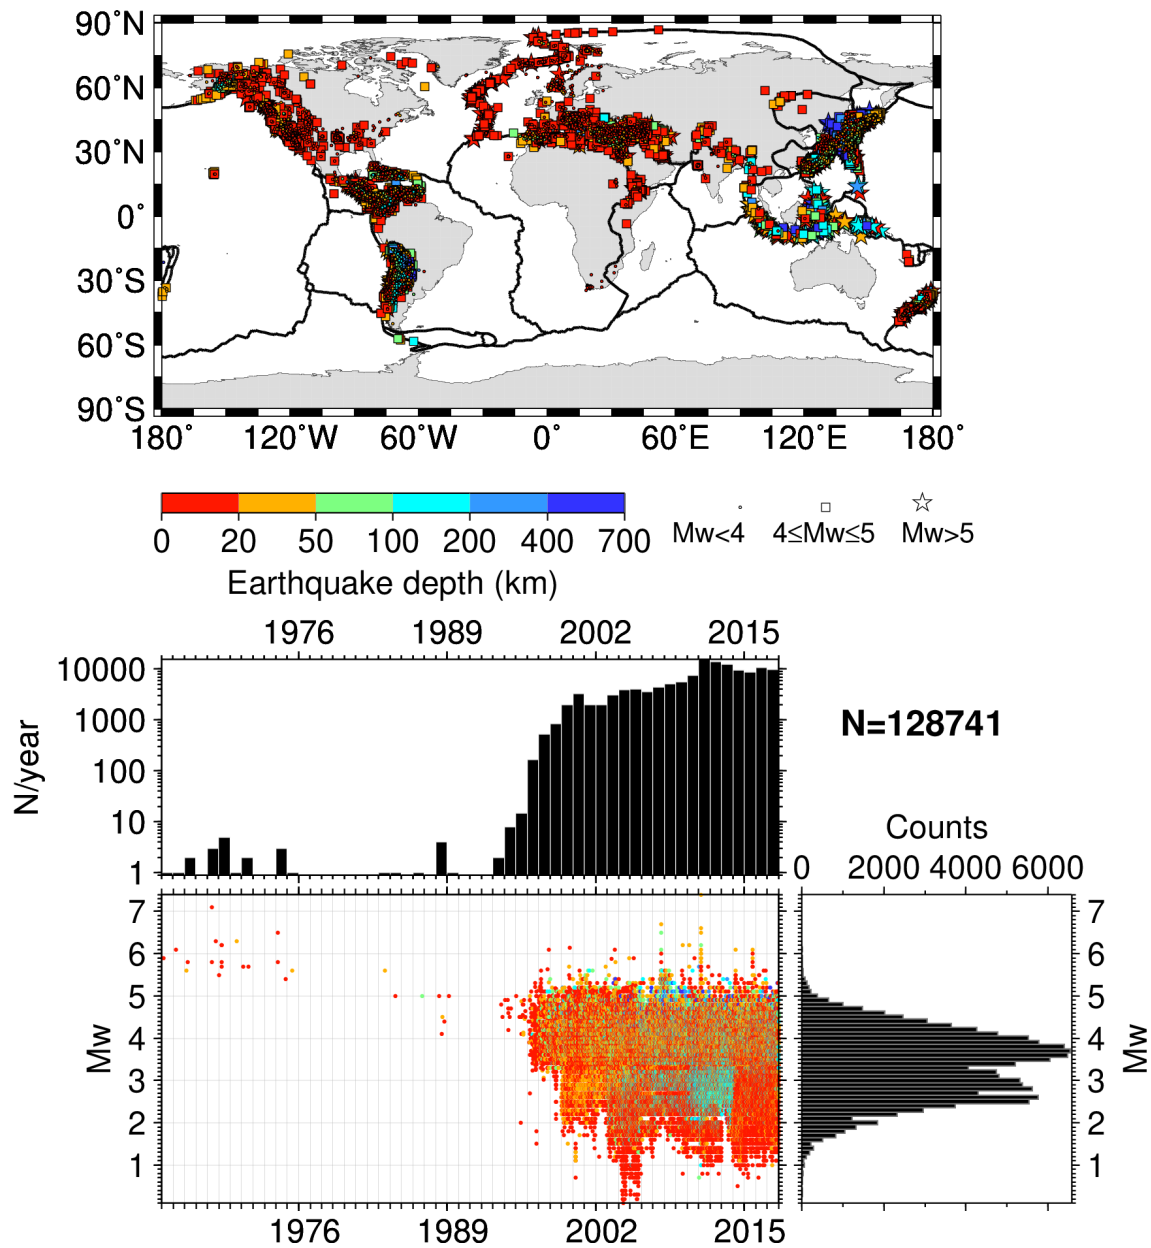

**Figure 16.** As for Fig. 2 but for earthquakes with  $M_w$  from regional agencies only (i.e., earthquakes with  $M_w$  from global agencies, with the exception of  $M_w$  from NEIC, are excluded). The map was drawn using the Generic Mapping Tools (GMT) (Wessel et al., 2013) software.

## Appendix A: Additional plots

Here we include additional summary plots similar to Fig. 2 or magnitude comparisons similar to Fig. 8 for agencies/magnitude authors or specific types of  $M_W$  that were not discussed in detail in the main text.



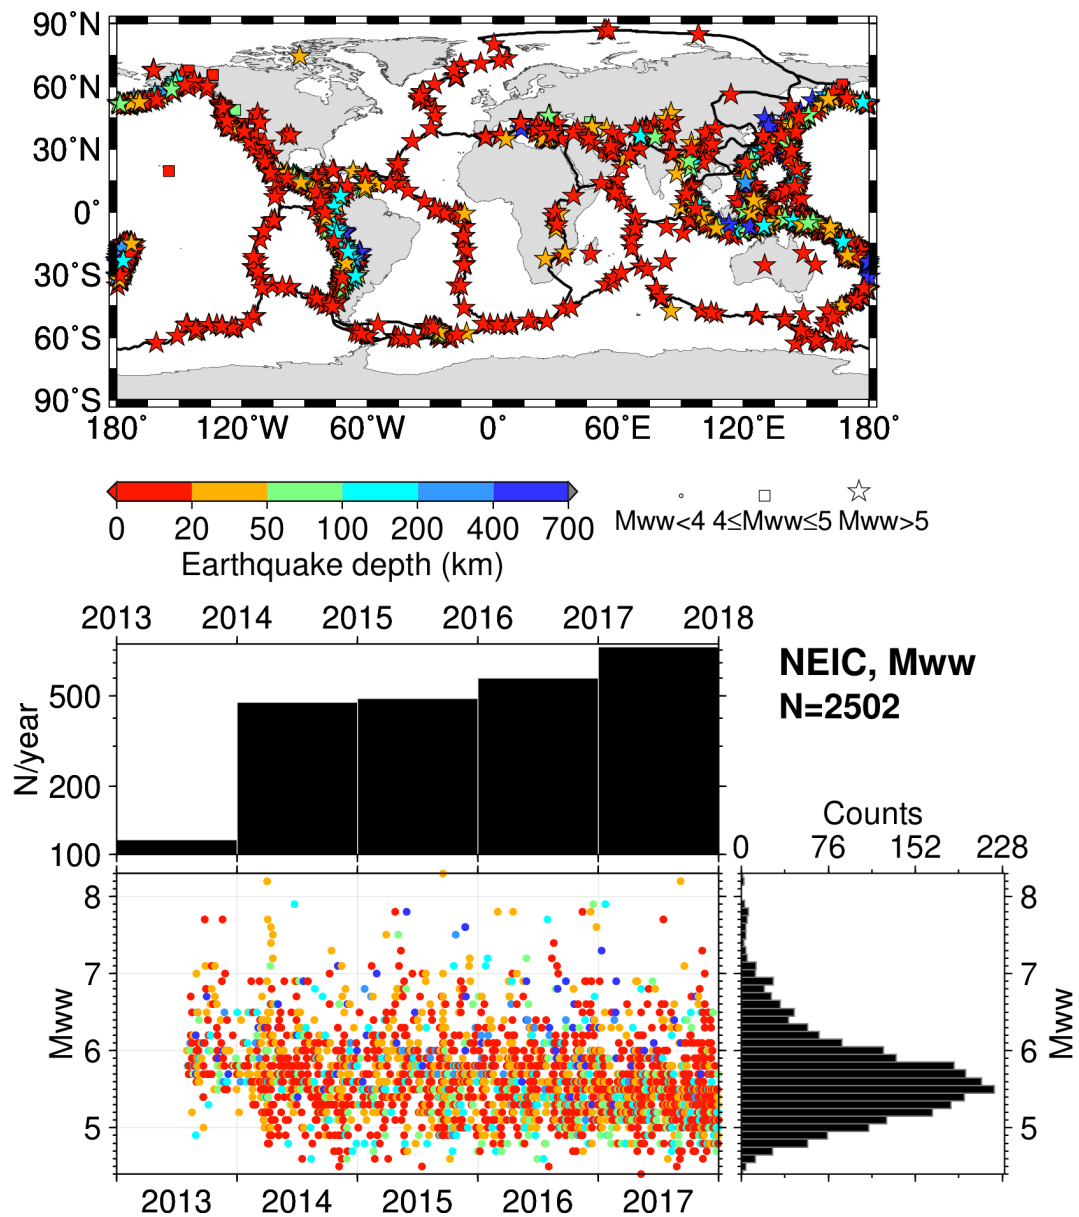

**Figure A1.** As for Fig. 2 but for agency/magnitude author = NEIC and  $M_w$ . The map was drawn using the Generic Mapping Tools (GMT) (Wessel et al., 2013) software.

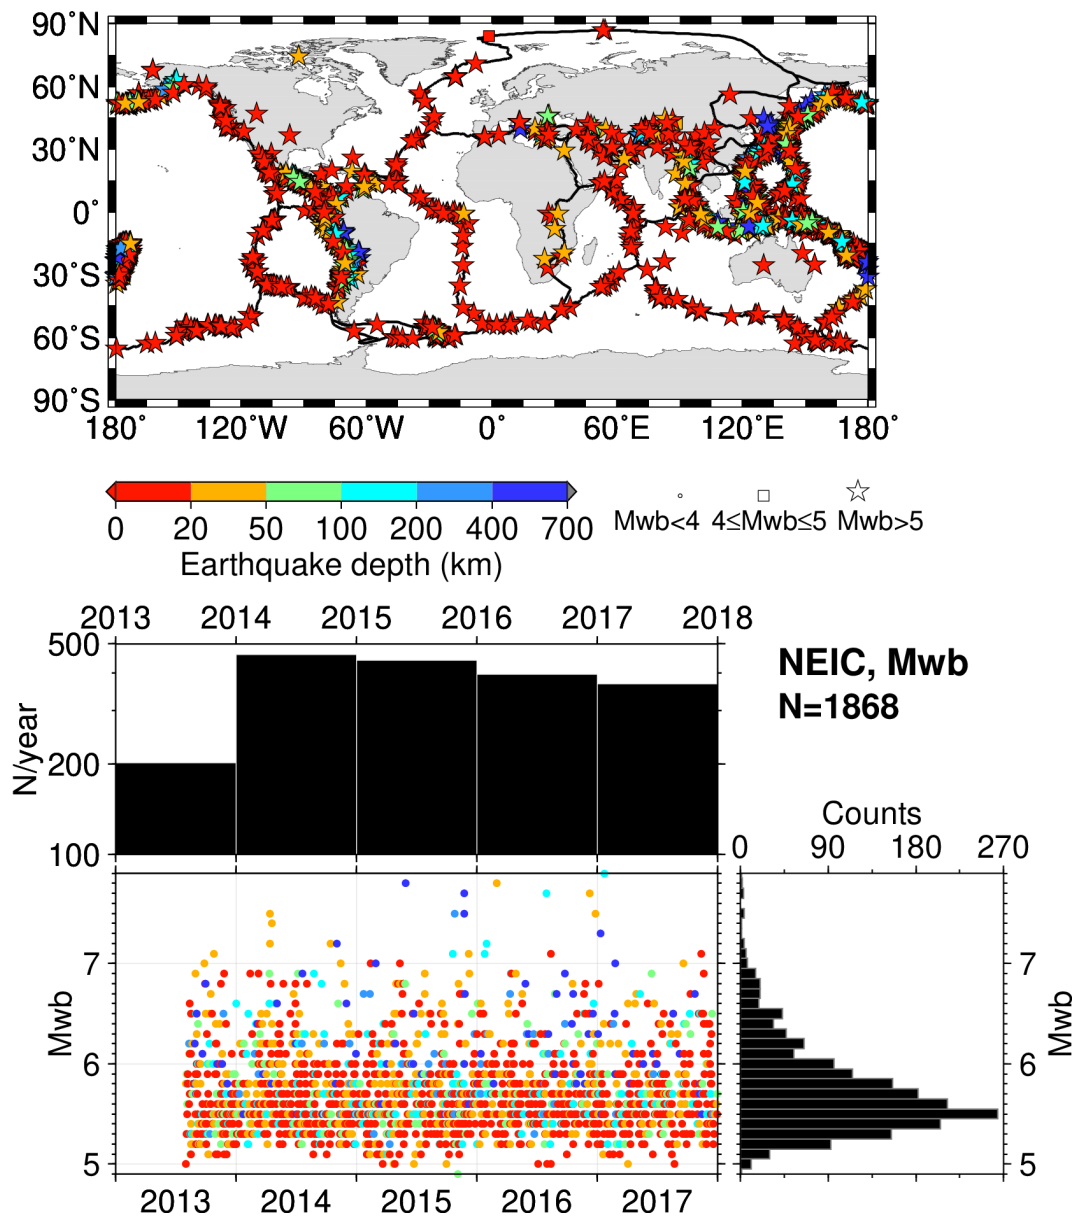

**Figure A2.** As for Fig. 2 but for agency/magnitude author = NEIC and  $M_{wb}$ . The map was drawn using the Generic Mapping Tools (GMT) (Wessel et al., 2013) software.



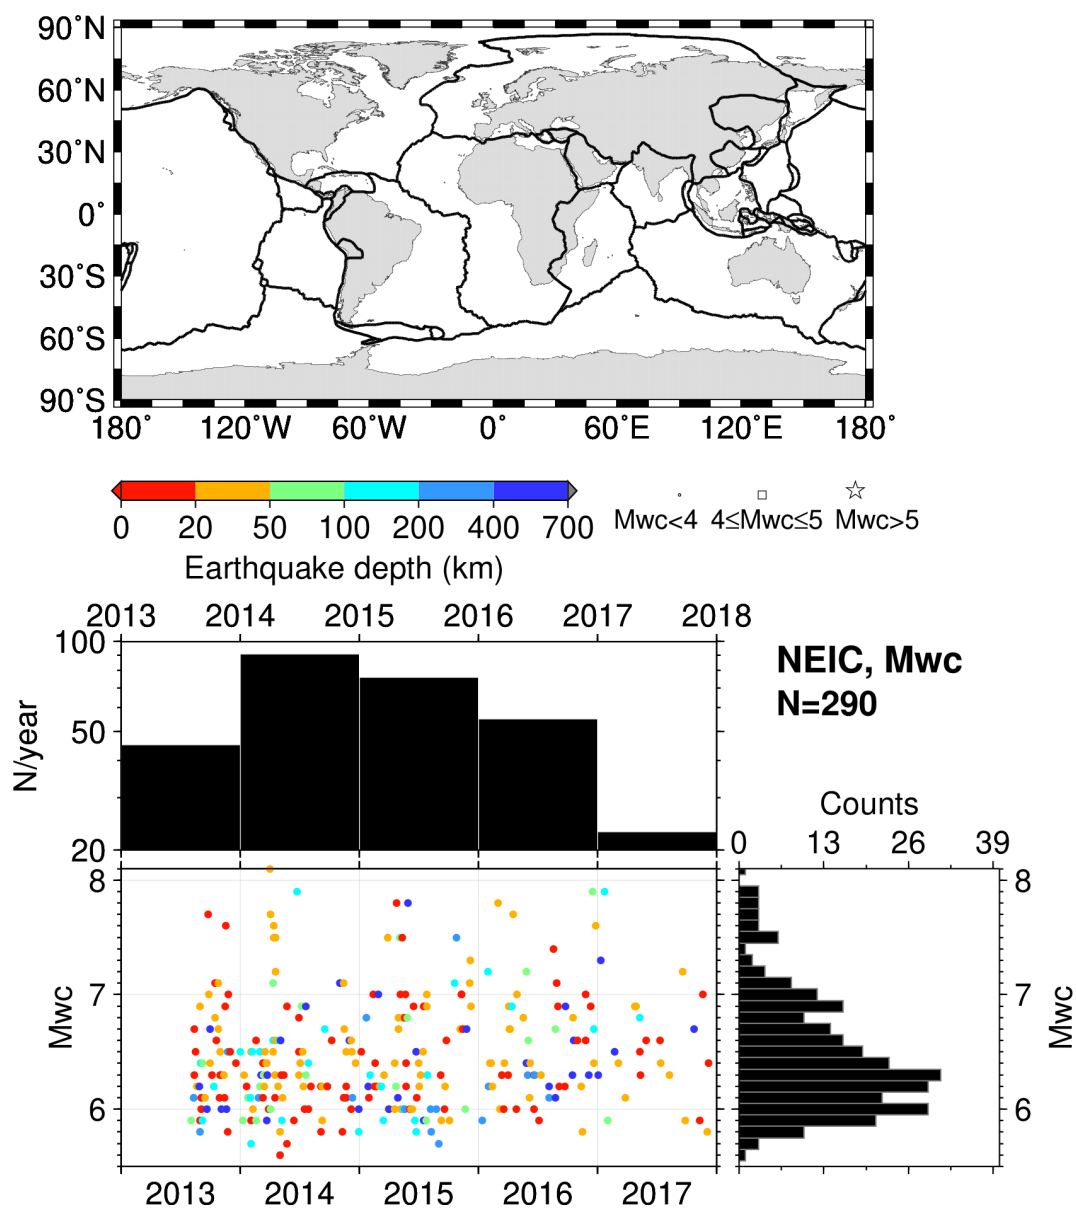

**Figure A3.** As for Fig. 2 but for agency/magnitude author = NEIC and  $M_{wc}$ . The map was drawn using the Generic Mapping Tools (GMT) (Wessel et al., 2013) software.

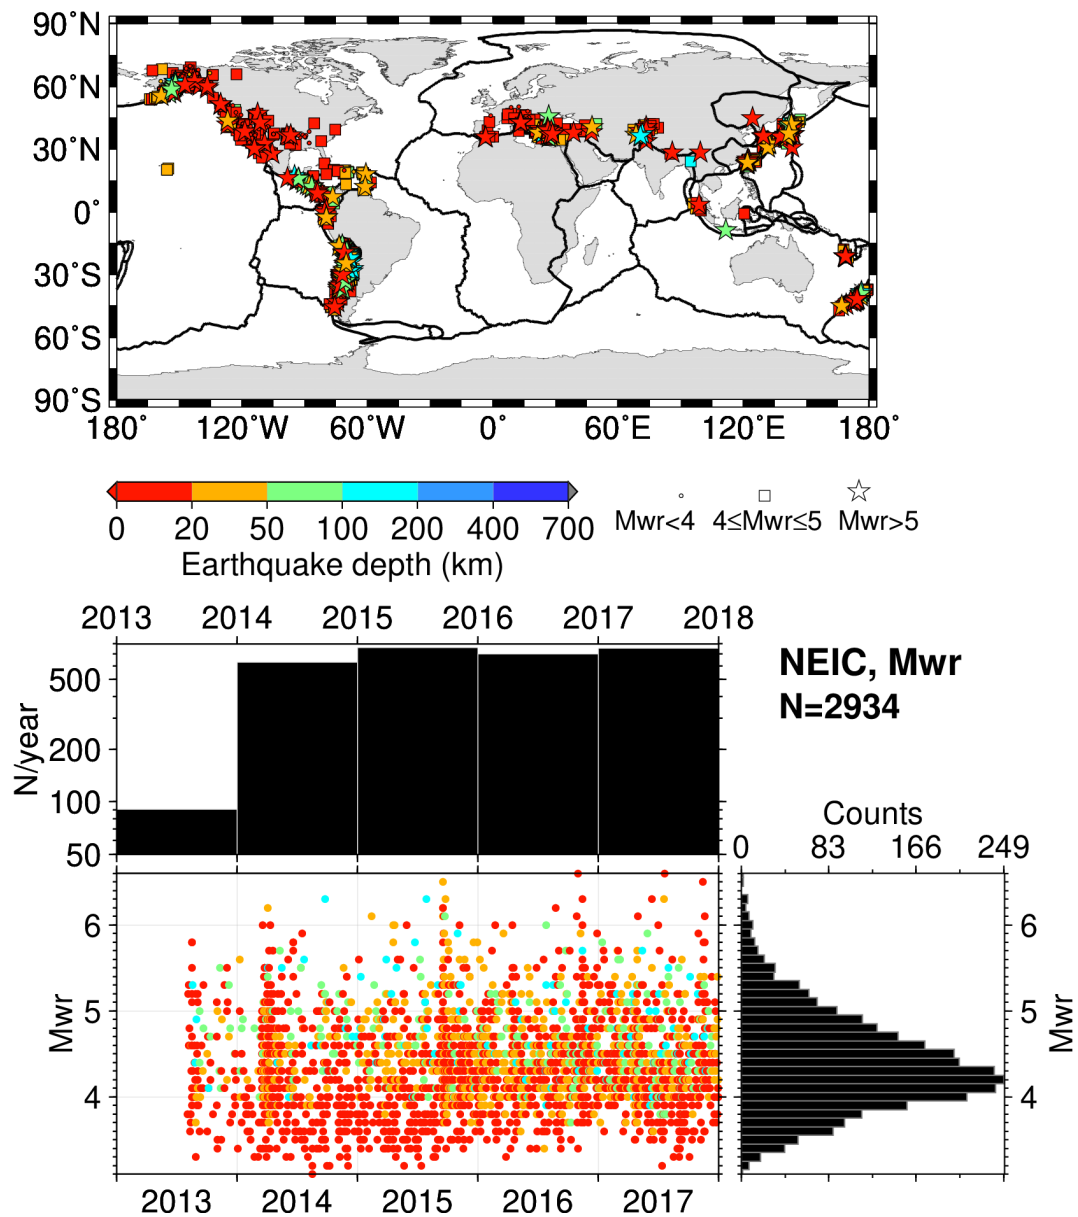

**Figure A4.** As for Fig. 2 but for agency/magnitude author = NEIC and  $M_{wr}$ . The map was drawn using the Generic Mapping Tools (GMT) (Wessel et al., 2013) software.

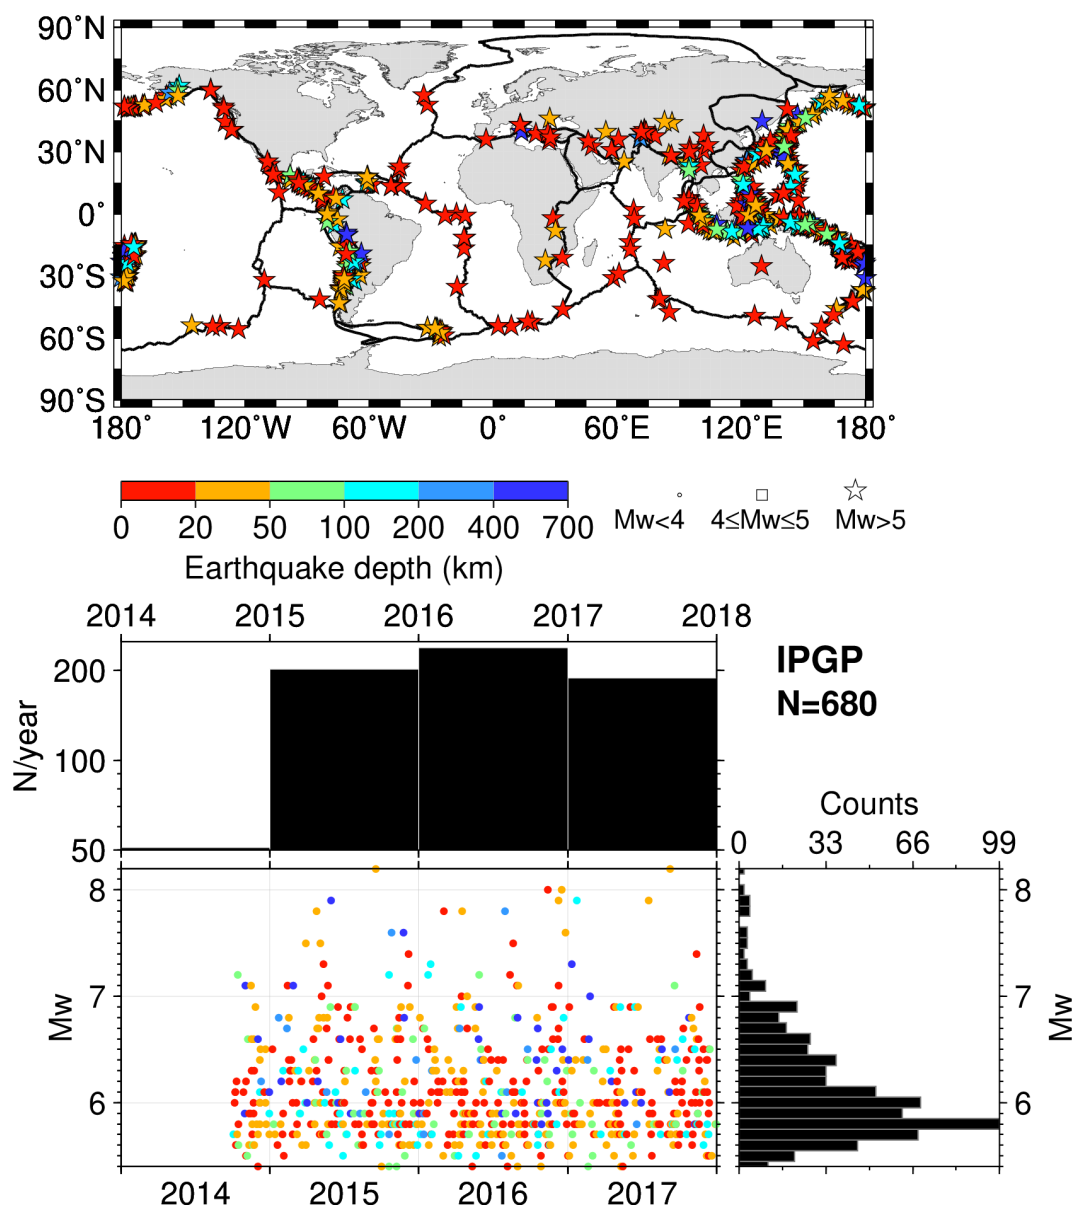

**Figure A5.** As for Fig. 2 but for agency/magnitude author = IPGP. The map was drawn using the Generic Mapping Tools (GMT) (Wessel et al., 2013) software.

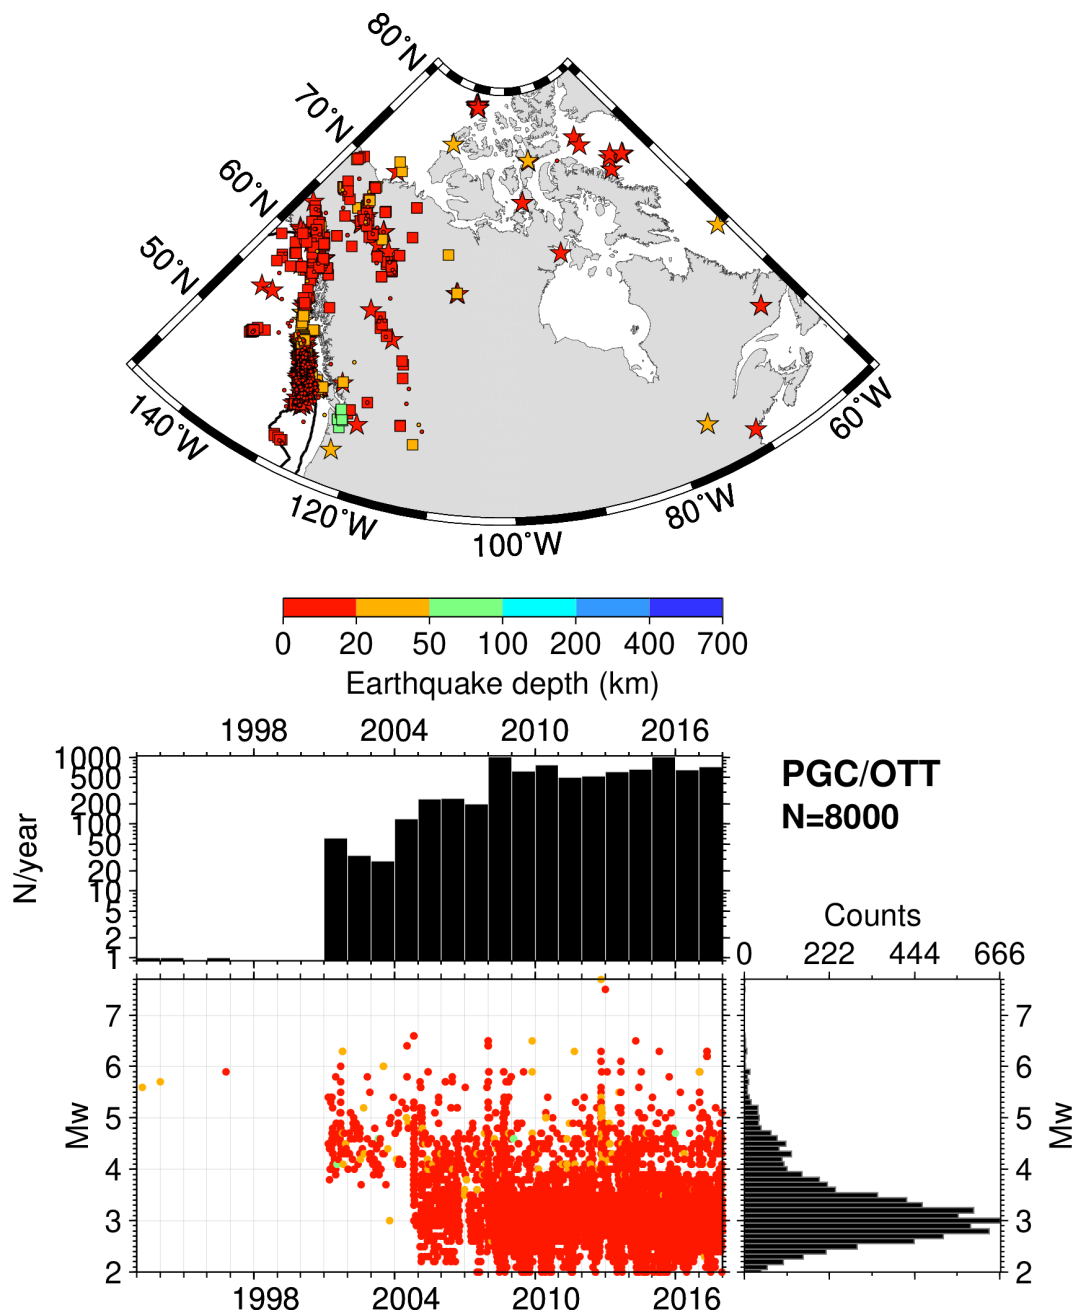

**Figure A6.** As for Fig.2 but for agency/magnitude author = PGC and OTT. The procedures used by this reporter are described at <http://www.isc.ac.uk/iscbulletin/agencies/OTT-MW-mags.pdf> and Mulder (2015). The map was drawn using the Generic Mapping Tools (GMT) (Wessel et al., 2013) software.

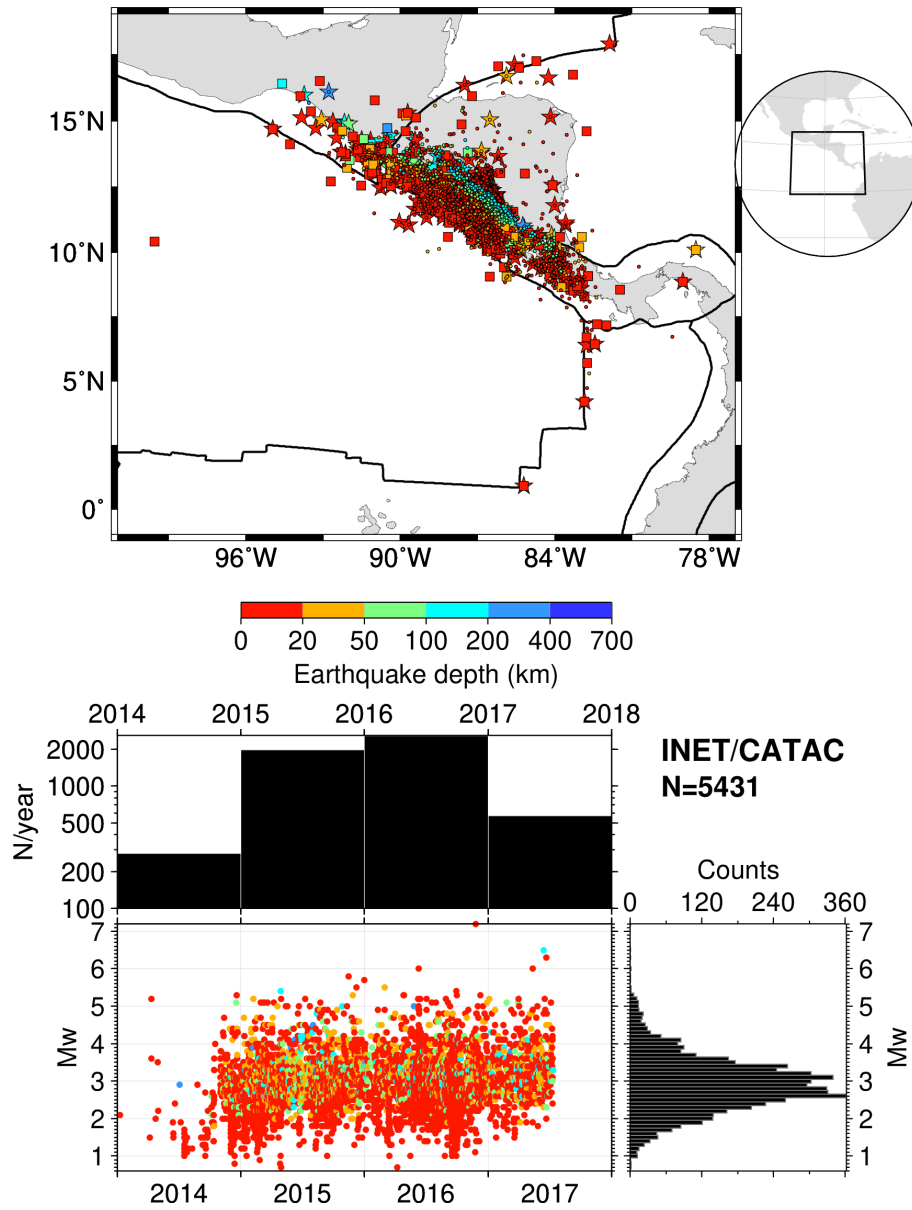

**Figure A7.** As for Fig. 2 but for agency/magnitude author = INET and CATAC. The map was drawn using the Generic Mapping Tools (GMT) (Wessel et al., 2013) software.

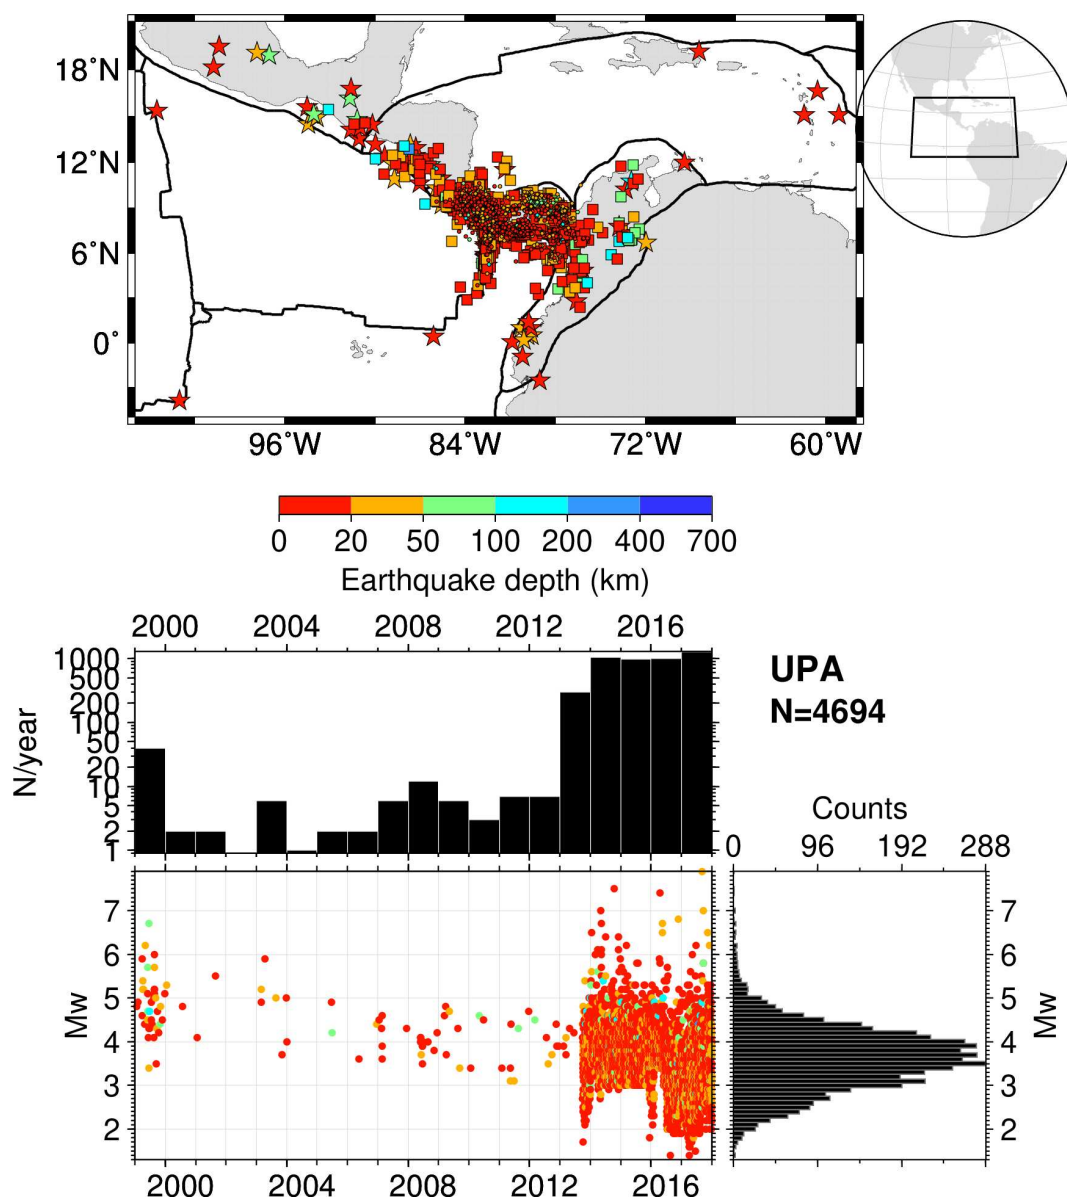

**Figure A8.** As for Fig. 2 but for agency/magnitude author = UPA. The map was drawn using the Generic Mapping Tools (GMT) (Wessel et al., 2013) software.

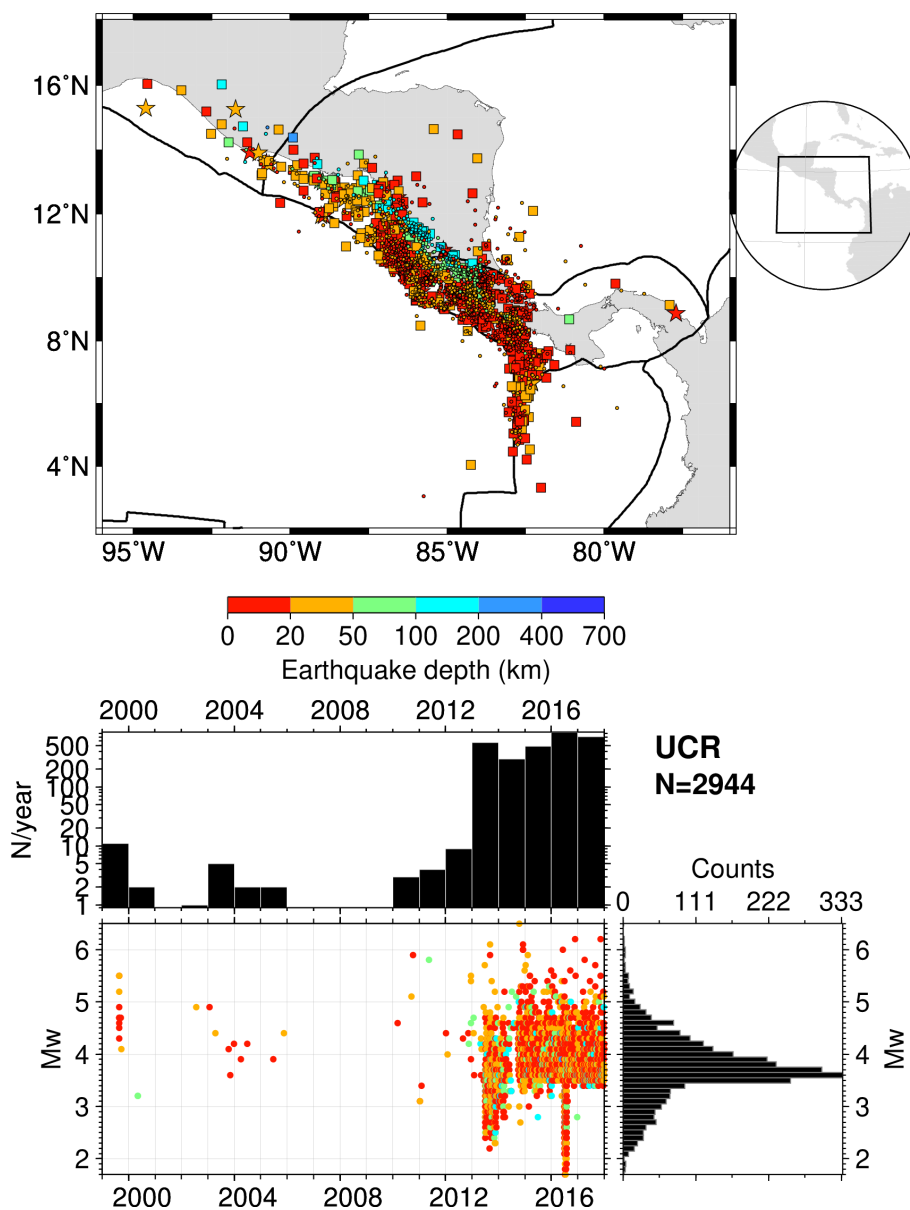

**Figure A9.** As for Fig. 2 but for agency/magnitude author = UCR. The map was drawn using the Generic Mapping Tools (GMT) (Wessel et al., 2013) software.

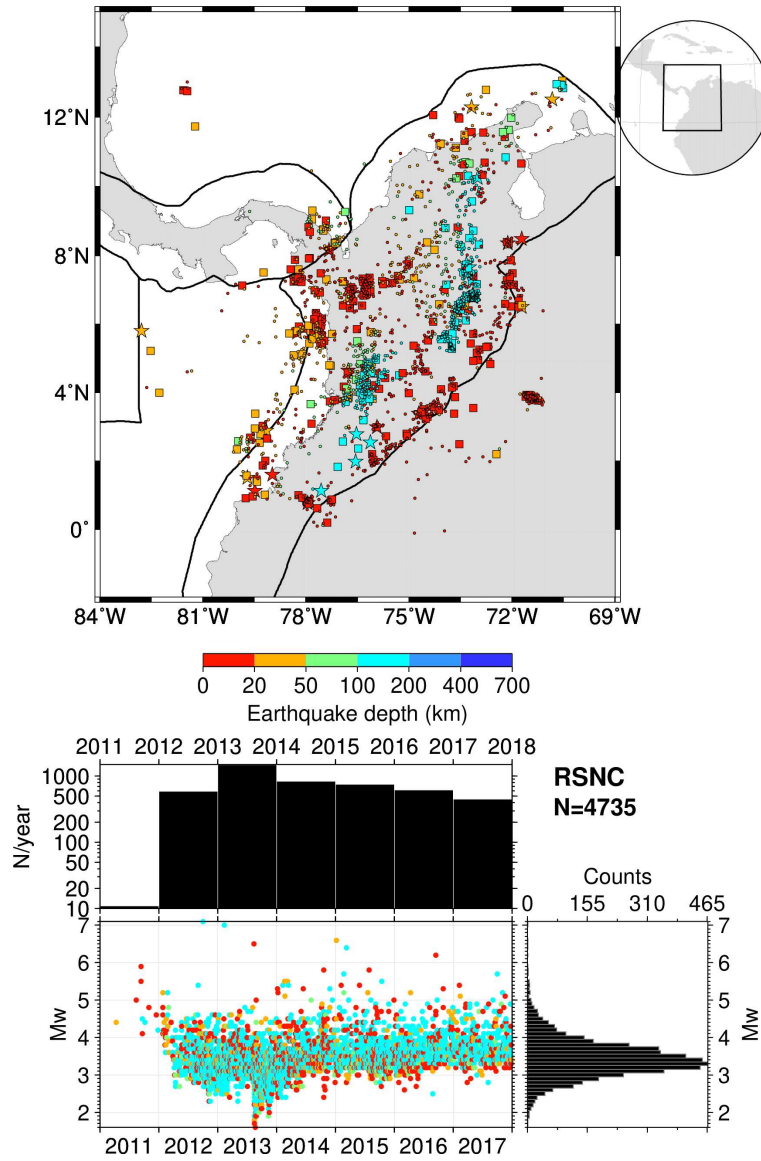

**Figure A10.** As for Fig. 2 but for agency/magnitude author = RSNC. The map was drawn using the Generic Mapping Tools (GMT) (Wessel et al., 2013) software.



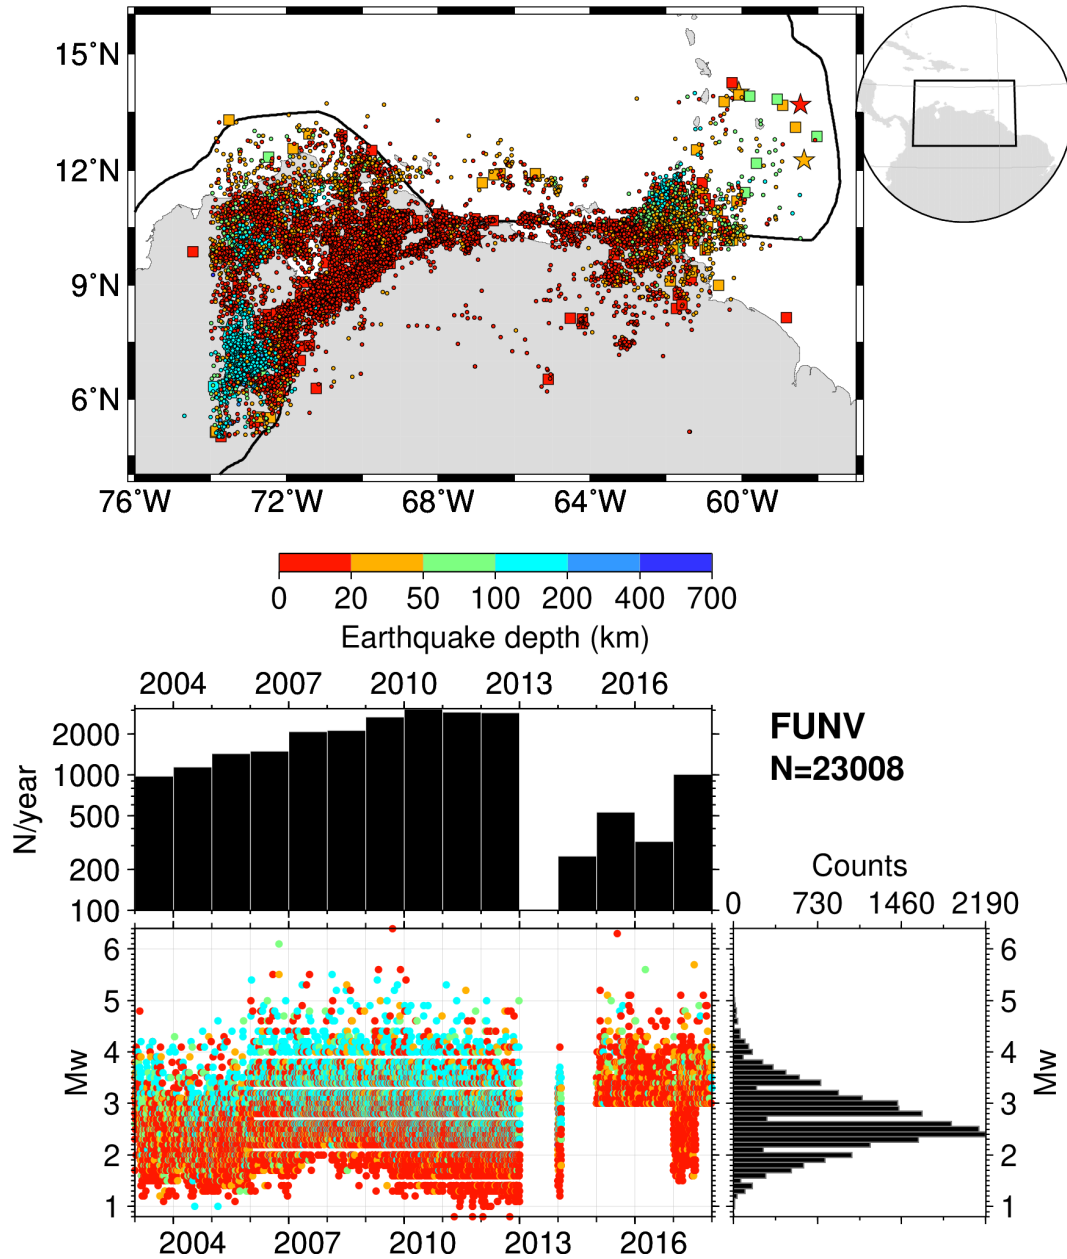

**Figure A11.** As for Fig. 2 but for agency/magnitude author = FUNV. Possible rounding effects in pre-2013  $M_w$  values are visible in the timeline and histograms. The map was drawn using the Generic Mapping Tools (GMT) (Wessel et al., 2013) software.

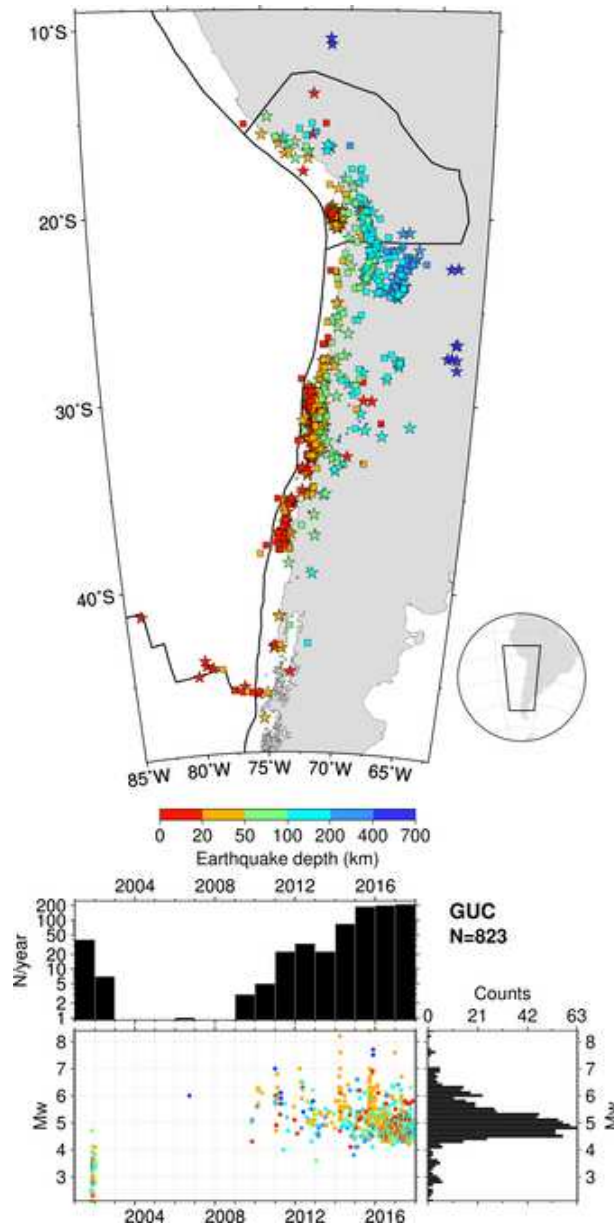

**Figure A12.** As for Fig. 2 but for agency/magnitude author = GUC. The map was drawn using the Generic Mapping Tools (GMT) (Wessel et al., 2013) software.

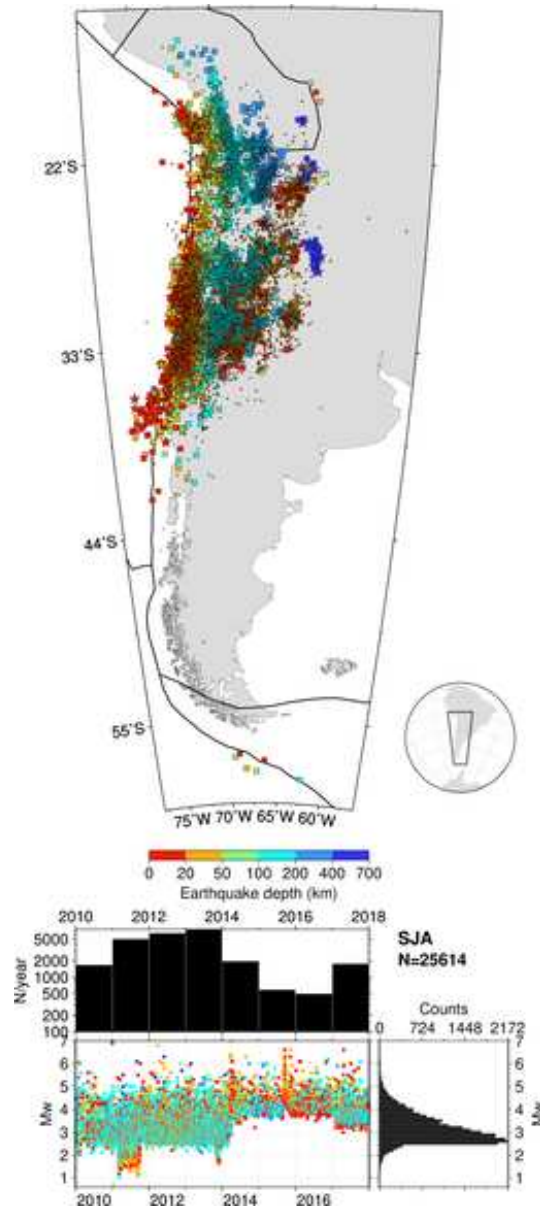

**Figure A13.** As for Fig. 2 but for agency/magnitude author = SJA. The map was drawn using the Generic Mapping Tools (GMT) (Wessel et al., 2013) software.

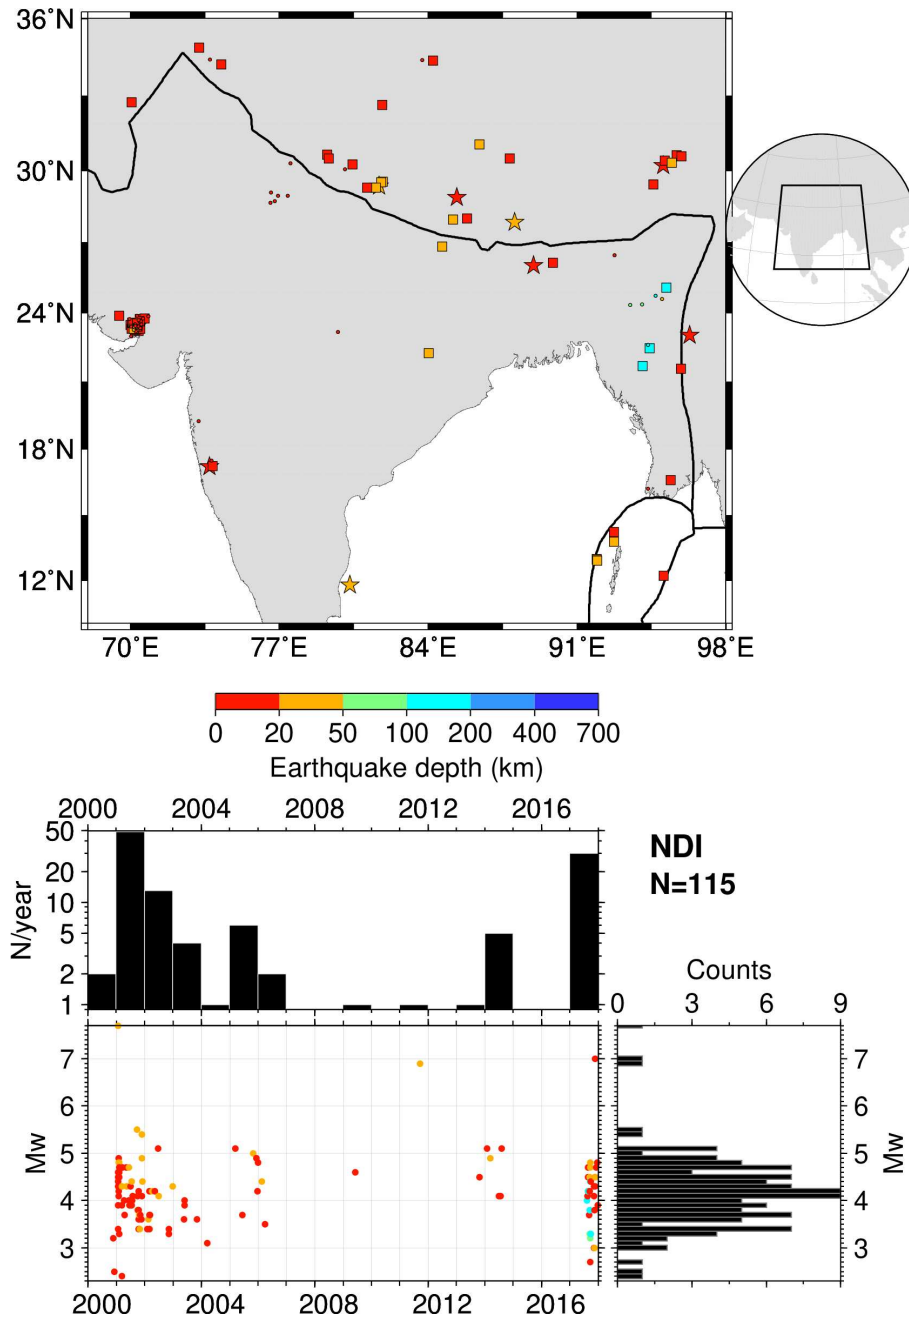

**Figure A14.** As for Fig. 2 but for agency/magnitude author = NDI. The map was drawn using the Generic Mapping Tools (GMT) (Wessel et al., 2013) software.

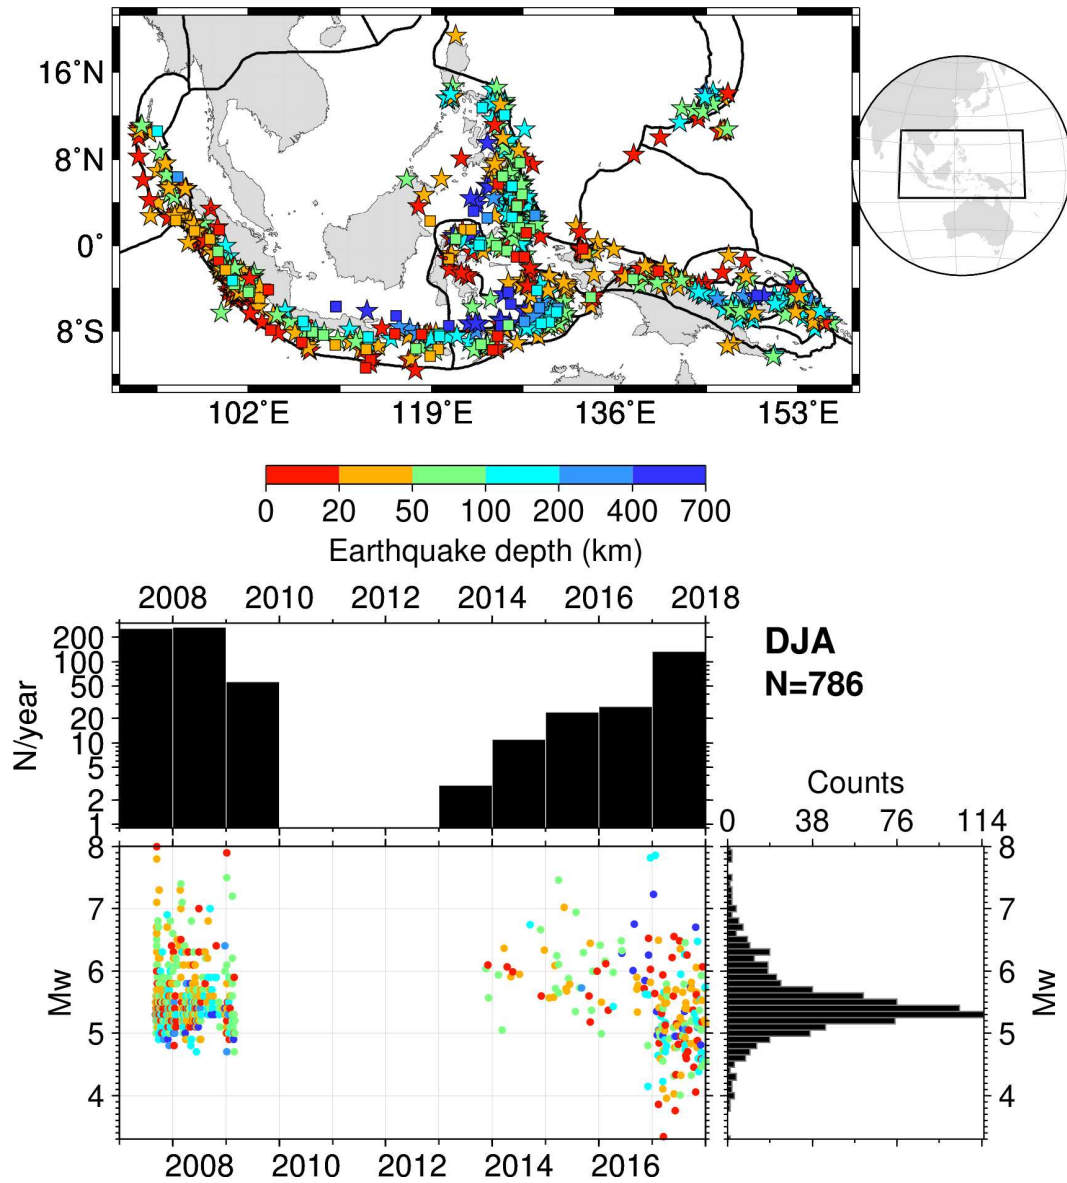

**Figure A15.** As for Fig. 2 but for agency/magnitude author = DJA. The map was drawn using the Generic Mapping Tools (GMT) (Wessel et al., 2013) software.

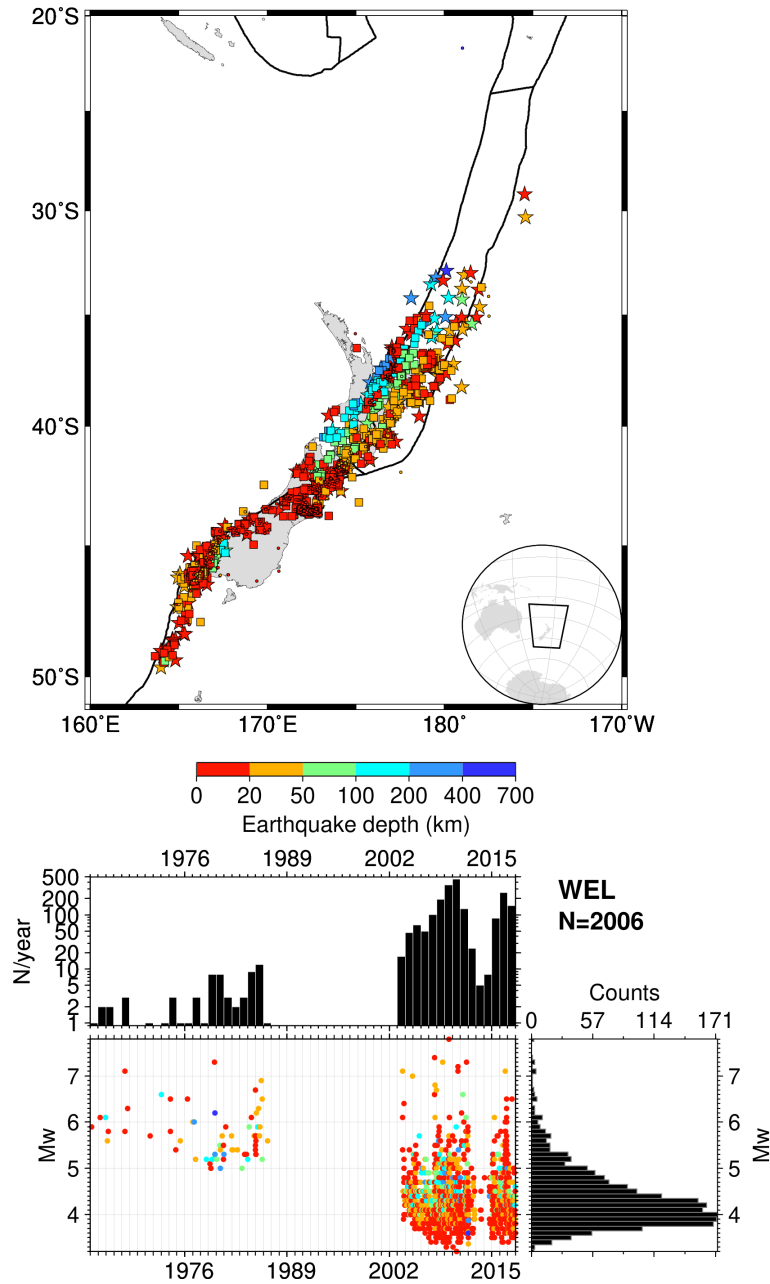

**Figure A16.** As for Fig. 2 but for agency/magnitude author = WEL. The map was drawn using the Generic Mapping Tools (GMT) (Wessel et al., 2013) software.

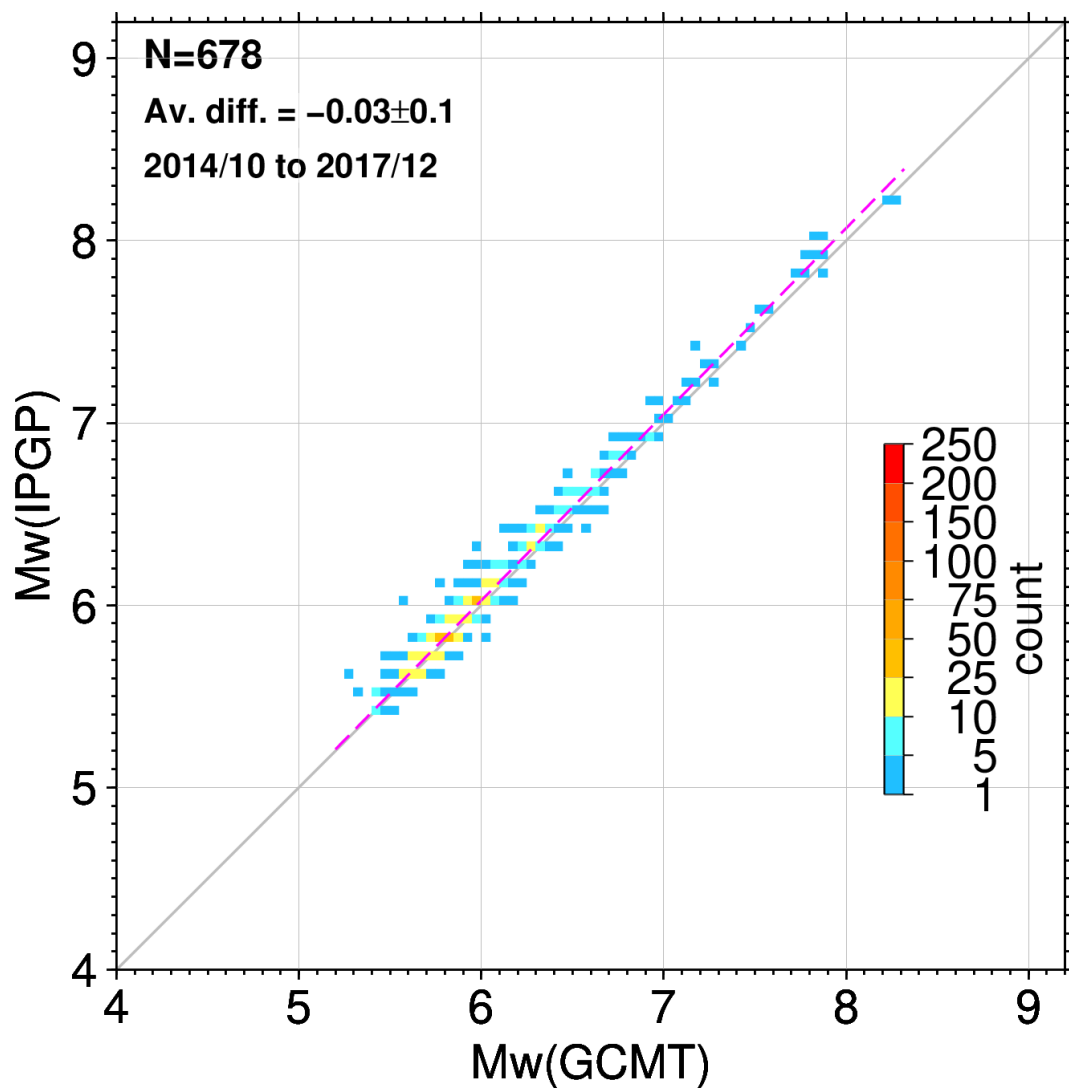

**Figure A17.** As for Fig. 8 but for GCMT and IPGP.

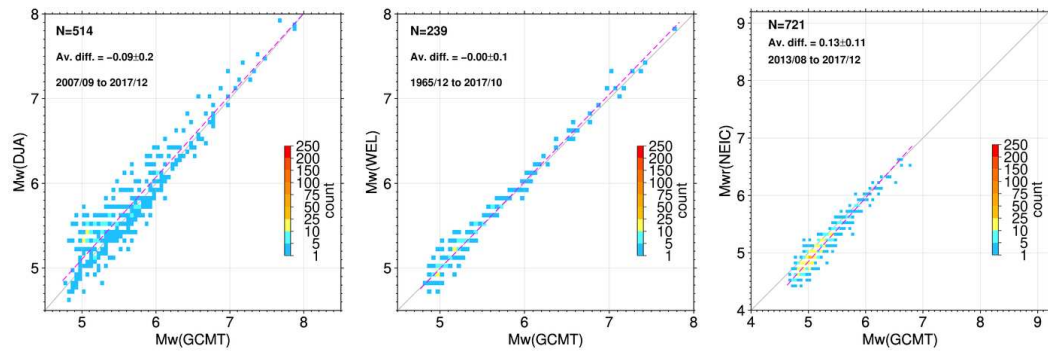

**Figure A18.** As for Fig. 8 but for GCMT and DJA (left), GCMT and WEL (middle), GCMT and  $M_{wr}$  NEIC (right).
